# Supplementary material
Source: Preprints.org preprint supplement (doi:10.20944/preprints202012.0030.v1)
Supplement: Supplementary file 2 [file supplementary]

	HLA-Mismatch A	HLA-Mismatch B	HLA-Mismatch DR	Sum HLA-Mismatch	Cav-1(pg/ml)	Caveolin_Classifier simplified (<1500 pg/ml = 0, 1500-2999 = 1, 3000-4499 = 2, <4499 = 3)	Antibodies developed (1 = yes_ 0 = no)	Sex (m=1_ f=2)	Tx-number total	Patient Age Serum Draw	Patient Age earliest Histology	Patient Age latest or sole Histology	Days between Serum Draw and early Biopsy	Days between Serum Draw and latest or sole Biopsy	Biopsy 1	i	t	v	g	ptc	ti	i-IFTA	C4d	cg	mm	ah	aah	cv	ci	ct	Glomeruli Global Sclerosis	Glomeruli Segmental Sclerosis	Glomeruli total number	Maximum intimal Elastosis in Arcuata or interlobular Artery (0=none, 1=minor if 2 elastica layers and/or up to 10% luminal stenosis, 2=moderate if 3 layers and/or 11-20% stenosis, 3=severe if 4 or more layers and/or > 21% stenosis)	Biopsy 2	i2	t2	v2	g2	ptc2	ti2	i-IFTA2	C4d2	cg2	mm2	ah2	aah2	cv2	ci2
HLA-Mismatch A__CORR	1	0.341480761	0.405294785	0.763017997	-0.082373048	0.00772177	-0.170521323	0.117736702	-0.07317809	0.25210261	0.209703613	0.22549016	-0.134924687	-0.085209294		0.039181196	0.073894889	0.039435505	0.070810909	0.055381862	-0.110966469	-0.22359477	-0.005144759	-0.016440109	0.068033903	0.011938548	-0.039803063	-0.068339365	0.04341689	-0.219559059	0.054318367	0.123909384	0.1046125	-0.01358465		-0.133368303	0.046024916	0	0.001972015	0	-0.833333333	-0.23570226	-0.125	-0.193205793	0.148000074	-0.03827085	-0.200160192	0.205196723	-0.304083573
HLA-Mismatch A__p-Value	0	0.001292097	0.000108367	1.36E-17	0.450848746	0.943746407	0.116477901	0.280307674	0.503116694	0.01919868	0.052640318	0.036845103	0.21549243	0.43535811	1	0.720214516	0.498932281	0.718474251	0.517063703	0.663811779	0.48975636	0.171213752	0.966786896	0.881288368	0.536132542	0.915223538	0.772947468	0.536787362	0.691421135	0.044781872	0.746017722	0.458586478	0.53193731	0.937323061	1	0.58622536	0.851584926	1	0.993607252	1	0.166666667	0.76429774	0.657135668	0.428068653	0.545400813	0.87638789	0.492650211	0.39937859	0.205614355
HLA-Mismatch A__number	86	86	86	86	86	86	86	86	86	86	86	86	86	86	86	86	86	86	86	64	41	39	68	85	85	82	55	84	86	84	38	38	38	36	86	19	19	18	19	18	4	4	15	19	19	19	14	19	19
HLA-Mismatch B__CORR	0.341480761	1	0.523502567	0.749387105	-0.068913507	-0.165046479	-0.15886822	0.014424331	0.068928801	0.067579429	0.055768856	0.059636168	0.013826546	0.002662985		0.14960211	-0.015454841	-0.035756046	0.01380847	0.227373615	0.011622122	-0.084761473	-0.104982287	0.041586626	-0.116903584	0.069714051	0.167092622	-0.276075899	0.07883728	-0.001088279	0.01927763	-0.14348524	0.145259546	-0.111649911		-0.050957896	-0.069801635	-0.054772256	0.454596915	-0.029704426	0	0.577350269	0.199204768	0.174063184	0.408270375	-0.104324443	-0.033140017	-0.021379005	-0.208072126
HLA-Mismatch B__p-Value	0.001292097	0	2.32E-07	1.05E-16	0.52838312	0.128859071	0.144009645	0.895130476	0.528291385	0.536415414	0.610045582	0.58545355	0.899453416	0.980586052	1	0.169192761	0.887685504	0.743788656	0.899584174	0.070780198	0.942507324	0.607924792	0.39420637	0.705507561	0.286650636	0.533709131	0.222721494	0.011022868	0.470581838	0.992161079	0.908543307	0.39011156	0.384215114	0.516797834	1	0.835873471	0.776449741	0.829098865	0.050531064	0.906857877	1	0.422649731	0.476608487	0.476041264	0.082679668	0.670814102	0.910452933	0.930773414	0.392658931
HLA-Mismatch B__number	86	86	86	86	86	86	86	86	86	86	86	86	86	86	86	86	86	86	86	64	41	39	68	85	85	82	55	84	86	84	38	38	38	36	86	19	19	18	19	18	4	4	15	19	19	19	14	19	19
HLA-Mismatch DR__CORR	0.405294785	0.523502567	1	0.798371614	-0.03660131	-0.021414854	-0.378171942	-0.102524785	-0.11867983	0.21905526	0.159759049	0.164491589	-0.092583817	-0.066364329		0.041469269	-0.005351748	-0.090716659	-0.101944692	-0.086283888	-0.114768309	-0.262841905	-0.084974431	-0.180279137	-0.217046114	0.042956289	0.131868602	-0.038479922	0.073681266	-0.034339567	-0.036951805	-0.184075159	0.142814167	-0.096020165		0.045848623	-0.339136216	-0.197948664	-0.186569132	-0.375734575	0	0.577350269	0.132221471	-0.208052317	-0.196494373	-0.151376684	0.216263489	-0.117894682	-0.170444798
HLA-Mismatch DR__p-Value	0.000108367	2.32E-07	0	3.39E-20	0.73794806	0.844837479	0.00033068	0.347555529	0.276445823	0.042724687	0.141745962	0.130167943	0.39652355	0.543783485	1	0.704609222	0.960995666	0.40615669	0.350304671	0.497814569	0.474908344	0.105962408	0.490839879	0.098730483	0.046011075	0.701578132	0.337205919	0.728201718	0.500177431	0.756482651	0.825674829	0.26859818	0.392355352	0.57747377	1	0.852147441	0.15548885	0.431064271	0.444403275	0.124389641	1	0.422649731	0.638542862	0.39270501	0.420093946	0.536165597	0.457725144	0.630739887	0.485399313
HLA-Mismatch DR__number	86	86	86	86	86	86	86	86	86	86	86	86	86	86	86	86	86	86	86	64	41	39	68	85	85	82	55	84	86	84	38	38	38	36	86	19	19	18	19	18	4	4	15	19	19	19	14	19	19
Sum HLA-Mismatch__CORR	0.763017997	0.749387105	0.798371614	1	-0.103863487	-0.08004147	-0.282766411	0.023672183	-0.05343795	0.275200895	0.229993985	0.241380707	-0.087988702	-0.056267537		0.090181355	0.00996743	-0.03895545	-0.022213299	0.061677005	-0.081197665	-0.218754954	-0.119127882	-0.071503309	-0.109774185	0.031081255	0.13400291	-0.119544353	0.107414199	-0.111433459	-0.014043251	-0.07597782	0.15508135	-0.059469266		-0.106214316	-0.13539603	-0.166209418	0.050922277	-0.270419139	-0.632455532	0	0.062894326	-0.110901955	0.178959501	-0.07993057	0.032227687	-0.005016461	-0.298184205
Sum HLA-Mismatch__p-Value	1.36E-17	1.05E-16	3.39E-20	0	0.341262838	0.463809198	0.008340509	0.828719028	0.62508175	0.010332877	0.033145749	0.025160186	0.420474886	0.606849294	1	0.408943559	0.927426009	0.721760509	0.83912853	0.628277592	0.613787305	0.180913455	0.333248054	0.515498262	0.317257596	0.781627414	0.329374715	0.27875748	0.324921952	0.312903374	0.933310376	0.650282715	0.352530406	0.73044916	1	0.665178805	0.580491698	0.509798729	0.835986712	0.2777854	0.367544468	1	0.823788023	0.651275541	0.463522824	0.744971422	0.912909474	0.983738838	0.21498911
Sum HLA-Mismatch__number	86	86	86	86	86	86	86	86	86	86	86	86	86	86	86	86	86	86	86	64	41	39	68	85	85	82	55	84	86	84	38	38	38	36	86	19	19	18	19	18	4	4	15	19	19	19	14	19	19
Cav-1(pg/ml)__CORR	-0.082373048	-0.068913507	-0.03660131	-0.103863487	1	0.770142794	-0.078382743	0.082092207	-0.00855929	-0.008806328	0.001856611	-0.007075642	0.042980011	0.075820741		-0.115868446	-0.144004539	0.086337367	-0.091094526	-0.006562251	0.046181134	0.096285362	0.108840508	0.00308445	-0.005794048	0.039260355	0.0082725	0.159619588	0.007367033	0.137224703	-0.000361937	0.084203249	0.099834047	-0.12437959		-0.16252822	-0.371855787	0.184466197	-0.09479149	0.0233741	-0.316227766	0	-0.353414715	-0.271038587	-0.351844606	-0.235385029	0.105096931	0.07428582	-0.207091338
Cav-1(pg/ml)__p-Value	0.450848746	0.52838312	0.73794806	0.341262838	0	4.54E-19	0.473152125	0.439172623	0.935821178	0.933972958	0.986064762	0.946927952	0.685828637	0.475032813		0.274076267	0.173249808	0.415793003	0.390472369	0.957643466	0.763234843	0.539076565	0.359346928	0.976982075	0.956776416	0.718070366	0.950416501	0.135134194	0.944745698	0.199719766	0.99818495	0.595991226	0.529317841	0.450600004		0.493583165	0.106436419	0.449645666	0.690982859	0.926650011	0.683772234	1	0.179334278	0.247733813	0.12818265	0.317784044	0.720667807	0.755606528	0.380997452
Cav-1(pg/ml)__number	86	86	86	86	91	91	86	91	91	91	91	91	91	91	91	91	91	91	91	68	45	43	73	90	90	87	59	89	91	89	42	42	42	39	91	20	20	19	20	18	4	4	16	20	20	20	14	20	20
Caveolin_Classifier simplified (<1500 pg/ml = 0, 1500-2999 = 1, 3000-4499 = 2, <4499 = 3)__CORR	0.00772177	-0.165046479	-0.021414854	-0.08004147	0.770142794	1	-0.211302559	0.1507209	-0.144095804	0.086313638	0.100443892	0.110202746	0.146980311	0.249967025		-0.191402021	-0.165972388	-0.13684438	-0.05348817	-0.143191757	-0.12388594	-0.002422339	0.100061664	0.064968888	-0.024044052	0.219878461	0.159084315	0.053892021	0.031451372	0.078176839	0.075753545	0.226854623	0.184790855	-0.190600571		-0.399621787	-0.517729771	0.030270132	-0.186217415	-0.212831537	0	0.577350269	-0.436984795	-0.275902449	-0.269954401	-0.054061309	0.23982242	0.084034552	-0.092812257
Caveolin_Classifier simplified (<1500 pg/ml = 0, 1500-2999 = 1, 3000-4499 = 2, <4499 = 3)__p-Value	0.943746407	0.128859071	0.844837479	0.463809198	4.54E-19	0	0.050822286	0.15384795	0.172974651	0.415921646	0.343472419	0.298383585	0.164442751	0.01686501		0.069146563	0.115877509	0.195851769	0.614576389	0.244054427	0.417482494	0.987700076	0.399626706	0.542937697	0.822021366	0.040722731	0.22878795	0.615953273	0.767266237	0.466486026	0.633497881	0.148533595	0.241372428	0.245127439		0.080867304	0.019380176	0.902095734	0.431820841	0.396482366	1	0.422649731	0.090554295	0.239014808	0.249704684	0.820915936	0.408902324	0.724658682	0.697139418
Caveolin_Classifier simplified (<1500 pg/ml = 0, 1500-2999 = 1, 3000-4499 = 2, <4499 = 3)__number	86	86	86	86	91	91	86	91	91	91	91	91	91	91	91	91	91	91	91	68	45	43	73	90	90	87	59	89	91	89	42	42	42	39	91	20	20	19	20	18	4	4	16	20	20	20	14	20	20
Antibodies developed (1 = yes_ 0 = no)__CORR	-0.170521323	-0.15886822	-0.378171942	-0.282766411	-0.078382743	-0.211302559	1	0.049341743	0.201154473	-0.252040653	-0.190235419	-0.208140313	0.161717476	0.090115246		0.177048475	0.197283085	0.017755864	0.114912733	0.226611529	0.259830663	0.062195625	-0.00251048	0.073007907	0.158551118	-0.201750359	-0.188552369	0.089154563	0.059210102	0.079070911	-0.143590704	0.015854386	0.003110962	-0.065501767		0.166974354	0.213471871	0.478091444	0.430324038	0.453742606	-0.707106781	-1	0.075377836	0.210934186	0.214019012	0.200230662	-0.073749613	0.257613688	-0.128896085
Antibodies developed (1 = yes_ 0 = no)__p-Value	0.116477901	0.144009645	0.00033068	0.008340509	0.473152125	0.050822286	0	0.651877306	0.06328771	0.019229295	0.079359446	0.054469097	0.136863918	0.409288506	1	0.102939867	0.068653227	0.871097659	0.2920854	0.071755543	0.100882233	0.706813626	0.983789565	0.506677228	0.147250867	0.069122272	0.168010387	0.419966538	0.58814061	0.474634589	0.389759612	0.924732605	0.985210735	0.704280504	1	0.494458929	0.380209832	0.044769317	0.065901269	0.058578556	0.292893219	0	0.789477249	0.386032756	0.378960836	0.411130669	0.802155488	0.286974284	0.598954621
Antibodies developed (1 = yes_ 0 = no)__number	86	86	86	86	86	86	86	86	86	86	86	86	86	86	86	86	86	86	86	64	41	39	68	85	85	82	55	84	86	84	38	38	38	36	86	19	19	18	19	18	4	4	15	19	19	19	14	19	19
Sex (m=1_ f=2)__CORR	0.117736702	0.014424331	-0.102524785	0.023672183	0.082092207	0.1507209	0.049341743	1	0.108845655	0.063165227	0.078171375	0.082585532	0.086071265	0.156690721		-0.068727915	-0.098485277	0.034169021	0.030480988	-0.153447859	-0.155663314	0.022697647	-0.339913041	0.032842073	0.011688576	0.036285448	-0.028279224	0.071301747	0.07437638	0.013623969	-0.139593784	0.144337567	0.412137499	0.017670591		-0.065061933	-0.011238793	0.267724835	-0.364627846	-0.193476497			-0.166410059	-0.288514178	-0.352832671	0.106833886	0.133972825	0.246969739	0.255270263
Sex (m=1_ f=2)__p-Value	0.280307674	0.895130476	0.347555529	0.828719028	0.439172623	0.15384795	0.651877306	0	0.304409683	0.55196204	0.461410073	0.436418194	0.417236949	0.138008056		0.517421394	0.353012058	0.747801445	0.774252317	0.211548739	0.307217629	0.88512848	0.003258495	0.758618887	0.912931828	0.738634011	0.831629829	0.506692794	0.483509802	0.89916425	0.377940406	0.361782938	0.006686683	0.914970936		0.785222864	0.962492256	0.267799944	0.11395772	0.441754828	1	1	0.537918044	0.217338324	0.127040295	0.653937577	0.647949739	0.293838756	0.277382106
Sex (m=1_ f=2)__number	86	86	86	86	91	91	86	91	91	91	91	91	91	91	91	91	91	91	91	68	45	43	73	90	90	87	59	89	91	89	42	42	42	39	91	20	20	19	20	18	4	4	16	20	20	20	14	20	20
Tx-number total__CORR	-0.07317809	0.068928801	-0.11867983	-0.05343795	-0.00855929	-0.144095804	0.201154473	0.108845655	1	-0.163481888	-0.146215397	-0.165398423	-0.081782933	-0.106330519		0.187298828	0.040301681	0.147732668	0.014531315	0.207291667	0.158094837	0.340866962	-0.133686819	0.066765828	-0.03082873	-0.16099839	-0.036325158	0.06419057	0.00588792	0.00640789	-0.221506522	-0.008664587	-0.137706058	-0.14932786		0.558575812	0.280944576	0.460628168	0.293511843	0.445566394	-0.5	-0.942809042	-0.059347442	-0.203212777	-0.252029374	-0.221887252	-0.528395949	0.167913288	-0.080971821
Tx-number total__p-Value	0.503116694	0.528291385	0.276445823	0.62508175	0.935821178	0.172974651	0.06328771	0.304409683	0	0.121526908	0.166674267	0.117161135	0.440904413	0.315786607		0.075438969	0.704470257	0.162269524	0.89125936	0.089856169	0.299628823	0.025298849	0.259498861	0.531813167	0.773004338	0.136300573	0.78474633	0.550087674	0.95582681	0.952475868	0.158602701	0.95656924	0.384487107	0.364241351		0.010470388	0.230187676	0.047174789	0.209118396	0.06386439	0.5	0.057190958	0.827176218	0.39017705	0.283737796	0.347110373	0.05208468	0.479176207	0.734339764
Tx-number total__number	86	86	86	86	91	91	86	91	91	91	91	91	91	91	91	91	91	91	91	68	45	43	73	90	90	87	59	89	91	89	42	42	42	39	91	20	20	19	20	18	4	4	16	20	20	20	14	20	20
Patient Age Serum Draw__CORR	0.25210261	0.067579429	0.21905526	0.275200895	-0.008806328	0.086313638	-0.252040653	0.063165227	-0.163481888	1	0.967251628	0.95354829	-0.131571432	-0.16419402		-0.33122572	-0.317443261	-0.025854699	-0.055799328	-0.288770347	-0.356881729	-0.21793082	-0.043095944	-0.045195699	0.051825573	0.021850087	-0.027326707	0.001935636	-0.040407416	-0.168141876	0.035013329	-0.089922515	0.06724532	0.252290979		-0.160738506	0.266944519	-0.383118086	-0.2083655	-0.328255254	-0.316227766	0.447213595	0.17930964	-0.030325934	0.253511456	0.069245491	0.188712839	0.106096881	0.007325649
Patient Age Serum Draw__p-Value	0.01919868	0.536415414	0.042724687	0.010332877	0.933972958	0.415921646	0.019229295	0.55196204	0.121526908	0	8.77E-55	3.71E-48	0.213803942	0.119890331		0.001341026	0.002168912	0.80779681	0.59934483	0.016929614	0.016106008	0.160349566	0.717333411	0.672304864	0.627595407	0.84079222	0.83722237	0.985636761	0.703730914	0.115242753	0.825768503	0.571171615	0.672202468	0.121266174		0.498417704	0.255228476	0.105430601	0.378008499	0.183552695	0.683772234	0.552786405	0.50638568	0.899005576	0.280820207	0.771752321	0.518206376	0.656183587	0.975547038
Patient Age Serum Draw__number	86	86	86	86	91	91	86	91	91	91	91	91	91	91	91	91	91	91	91	68	45	43	73	90	90	87	59	89	91	89	42	42	42	39	91	20	20	19	20	18	4	4	16	20	20	20	14	20	20
Patient Age earliest Histology__CORR	0.209703613	0.055768856	0.159759049	0.229993985	0.001856611	0.100443892	-0.190235419	0.078171375	-0.146215397	0.967251628	1	0.987370285	0.038856466	-0.008140092		-0.365878735	-0.346014072	-0.05209793	-0.032245372	-0.304294429	-0.358258315	-0.237809342	-0.048957142	0.054297793	0.113118784	0.115086609	0.100404689	-0.016082828	0.02662167	-0.089954332	0.061928846	-0.078694985	0.034707645	0.258703321		-0.181098633	0.263950005	-0.356382018	-0.194183909	-0.304492423	-0.632455532	0	0.171133693	-0.040546341	0.241141343	0.049481219	0.150303733	0.092997226	-0.013420224
Patient Age earliest Histology__p-Value	0.052640318	0.610045582	0.141745962	0.033145749	0.986064762	0.343472419	0.079359446	0.461410073	0.166674267	8.77E-55	0	5.21E-73	0.714603005	0.938958193		0.000361761	0.000780713	0.623818595	0.761563773	0.011639407	0.015672482	0.124638377	0.680839957	0.611250816	0.288440097	0.28848002	0.449267434	0.881088194	0.802209755	0.401844158	0.696827094	0.620331847	0.827266447	0.11177988		0.444807492	0.260800465	0.13422267	0.412015306	0.21924342	0.367544468	1	0.526270671	0.865228626	0.305743846	0.835881429	0.60803417	0.696563276	0.955218489
Patient Age earliest Histology__number	86	86	86	86	91	91	86	91	91	91	91	91	91	91	91	91	91	91	91	68	45	43	73	90	90	87	59	89	91	89	42	42	42	39	91	20	20	19	20	18	4	4	16	20	20	20	14	20	20
Patient Age latest or sole Histology__CORR	0.22549016	0.059636168	0.164491589	0.241380707	-0.007075642	0.110202746	-0.208140313	0.082585532	-0.165398423	0.95354829	0.987370285	1	0.046497365	0.062764217		-0.382869224	-0.346498837	-0.058221153	-0.052395629	-0.32213555	-0.354443863	-0.244182302	-0.051194926	0.076565803	0.118020835	0.132107023	0.127217833	-0.009359718	0.042360077	-0.098072871	0.067203077	-0.084340043	0.043070913	0.251885556		-0.266057538	0.307011947	-0.395631905	-0.264106776	-0.350973896	0	0.23570226	0.141963177	0.052883778	0.295317602	0.118585072	0.139184324	0.05389776	0.045919482
Patient Age latest or sole Histology__p-Value	0.036845103	0.58545355	0.130167943	0.025160186	0.946927952	0.298383585	0.054469097	0.436418194	0.117161135	3.71E-48	5.21E-73	0	0.661631484	0.554494387		0.000179942	0.000766645	0.583566911	0.621834543	0.007384955	0.016898716	0.114561016	0.667092135	0.473209139	0.26791789	0.222561896	0.336964813	0.930629352	0.690127286	0.360535606	0.672396839	0.595392108	0.786519273	0.121885625		0.256870964	0.187952435	0.093608542	0.260506865	0.153274796	1	0.76429774	0.599959476	0.824758056	0.206199682	0.618523408	0.635109797	0.821449343	0.847557359
Patient Age latest or sole Histology__number	86	86	86	86	91	91	86	91	91	91	91	91	91	91	91	91	91	91	91	68	45	43	73	90	90	87	59	89	91	89	42	42	42	39	91	20	20	19	20	18	4	4	16	20	20	20	14	20	20
Days between Serum Draw and early Biopsy__CORR	-0.134924687	0.013826546	-0.092583817	-0.087988702	0.042980011	0.146980311	0.161717476	0.086071265	-0.081782933	-0.131571432	0.038856466	0.046497365	1	0.835902439		-0.103861157	0.0433616	-0.117802201	0.199240131	-0.032468352	0.074816311	-0.069626562	-0.109306416	0.450661396	0.16871543	0.481269207	0.614091195	-0.018425738	0.420449696	0.425545994	0.16954287	0.275097387	-0.110180711	0.168788074		0.217503641	-0.017204799	0.290002674	0.34051566	-0.023386171	0.948683298	0.894427191	0.067964368	0.206339655	0.042983361	0.157518156	0.052548465	0.096607892	0.33268942
Days between Serum Draw and early Biopsy__p-Value	0.21549243	0.899453416	0.39652355	0.420474886	0.685828637	0.164442751	0.136863918	0.417236949	0.440904413	0.213803942	0.714603005	0.661631484	0	6.53E-25		0.327220018	0.683187638	0.266093401	0.05830659	0.792669046	0.625234305	0.657290466	0.357281471	8.30E-06	0.111920592	2.37E-06	2.31E-07	0.86392084	3.33E-05	3.22E-05	0.283092221	0.077861934	0.48729167	0.304336029		0.35696187	0.942607596	0.228446692	0.141805426	0.92661223	0.051316702	0.105572809	0.802515143	0.382766962	0.857205581	0.507174367	0.858402166	0.685349175	0.151789899
Days between Serum Draw and early Biopsy__number	86	86	86	86	91	91	86	91	91	91	91	91	91	91	91	91	91	91	91	68	45	43	73	90	90	87	59	89	91	89	42	42	42	39	91	20	20	19	20	18	4	4	16	20	20	20	14	20	20
Days between Serum Draw and latest or sole Biopsy__CORR	-0.085209294	0.002662985	-0.066364329	-0.056267537	0.075820741	0.249967025	0.090115246	0.156690721	-0.106330519	-0.16419402	-0.008140092	0.062764217	0.835902439	1		-0.11227529	0.015779203	-0.136134064	0.112928865	-0.078059227	0.115878636	-0.066297802	-0.104296956	0.418026559	0.113410305	0.477548491	0.597283188	0.036805449	0.425070763	0.384866186	0.195062533	0.224569295	-0.048336294	0.135966676		-0.383179114	-0.053919089	-0.079056942	0.008617408	-0.350611506	0.948683298	0.894427191	0.007767356	0.482414592	0.397243909	0.514954961	0.480443113	-0.059428656	0.441794855
Days between Serum Draw and latest or sole Biopsy__p-Value	0.43535811	0.980586052	0.543783485	0.606849294	0.475032813	0.01686501	0.409288506	0.138008056	0.315786607	0.119890331	0.938958193	0.554494387	6.53E-25	0		0.28933269	0.881985749	0.198204686	0.286516606	0.526912932	0.448437745	0.672734244	0.37987243	4.14E-05	0.287191297	2.91E-06	5.92E-07	0.732027732	2.67E-05	0.00019608	0.215741191	0.152777217	0.761143803	0.409185238		0.095386138	0.821379774	0.747672018	0.971236734	0.153728945	0.051316702	0.105572809	0.977224066	0.031222211	0.082858647	0.020155487	0.082054679	0.803453945	0.05114687
Days between Serum Draw and latest or sole Biopsy__number	86	86	86	86	91	91	86	91	91	91	91	91	91	91	91	91	91	91	91	68	45	43	73	90	90	87	59	89	91	89	42	42	42	39	91	20	20	19	20	18	4	4	16	20	20	20	14	20	20
Biopsy 1__CORR
Biopsy 1__p-Value	1	1	1	1			1													1	1	1	1	1	1	1	1	1		1	1	1	1	1		1	1	1	1	1	1	1	1	1	1	1	1	1	1
Biopsy 1__number	86	86	86	86	91	91	86	91	91	91	91	91	91	91	91	91	91	91	91	68	45	43	73	90	90	87	59	89	91	89	42	42	42	39	91	20	20	19	20	18	4	4	16	20	20	20	14	20	20
i__CORR	0.039181196	0.14960211	0.041469269	0.090181355	-0.115868446	-0.191402021	0.177048475	-0.068727915	0.187298828	-0.33122572	-0.365878735	-0.382869224	-0.103861157	-0.11227529		1	0.532497132	0.249849317	0.118039962	0.673841983	0.815764906	0.316215606	0.152533393	0.022211719	-0.04478642	-0.188492653	-0.130262584	0.178209901	0.228021104	0.078351197	-0.028743304	-0.240186777	-0.212044854	-0.117097775		0.204982487	-0.286641523	0.412483919	0.405396884	0.427092918	0	-0.23570226	-0.207606108	0.228985507	0.165420496	0.271383305	-0.043874844	0.25473402	0.362261463
i__p-Value	0.720214516	0.169192761	0.704609222	0.408943559	0.274076267	0.069146563	0.102939867	0.517421394	0.075438969	0.001341026	0.000361761	0.000179942	0.327220018	0.28933269		0	5.55E-08	0.016918453	0.26512286	3.02E-10	8.74E-12	0.038847084	0.197639569	0.835385944	0.675104662	0.080390902	0.325432417	0.094748189	0.029717372	0.465489495	0.856608156	0.125488104	0.177618333	0.477746877		0.38597345	0.220472281	0.079253882	0.076178938	0.077105271	1	0.76429774	0.440395072	0.331497665	0.485819088	0.247109263	0.881609603	0.278427562	0.116501176
i__number	86	86	86	86	91	91	86	91	91	91	91	91	91	91	91	91	91	91	91	68	45	43	73	90	90	87	59	89	91	89	42	42	42	39	91	20	20	19	20	18	4	4	16	20	20	20	14	20	20
t__CORR	0.073894889	-0.015454841	-0.005351748	0.00996743	-0.144004539	-0.165972388	0.197283085	-0.098485277	0.040301681	-0.317443261	-0.346014072	-0.346498837	0.0433616	0.015779203		0.532497132	1	0.223949037	0.206956634	0.469435147	0.598447009	0.317274664	0.126947349	0.061425408	-0.019860886	-0.080550964	-0.213210402	-0.000568392	0.119993633	0.008495452	-0.165551869	-0.119646027	-0.291662118	-0.321620513		0.10824362	-0.17747249	0.354722165	0.457789141	0.454398209	0	-0.23570226	0.053881313	0.435836629	0.421923634	0.478354333	0.09207036	0.23846881	0.112125719
t__p-Value	0.498932281	0.887685504	0.960995666	0.927426009	0.173249808	0.115877509	0.068653227	0.353012058	0.704470257	0.002168912	0.000780713	0.000766645	0.683187638	0.881985749		5.55E-08	0	0.032843668	0.049031889	5.38E-05	1.41E-05	0.038162773	0.284504465	0.56520312	0.852600478	0.458288056	0.104939781	0.995782083	0.257238762	0.937021201	0.294743805	0.450421945	0.06091385	0.045871759		0.649649419	0.454128841	0.136175354	0.042388768	0.058169376	1	0.76429774	0.842900239	0.054740882	0.063879924	0.032883995	0.754248344	0.311299015	0.637895809
t__number	86	86	86	86	91	91	86	91	91	91	91	91	91	91	91	91	91	91	91	68	45	43	73	90	90	87	59	89	91	89	42	42	42	39	91	20	20	19	20	18	4	4	16	20	20	20	14	20	20
v__CORR	0.039435505	-0.035756046	-0.090716659	-0.03895545	0.086337367	-0.13684438	0.017755864	0.034169021	0.147732668	-0.025854699	-0.05209793	-0.058221153	-0.117802201	-0.136134064		0.249849317	0.223949037	1	0.068232352	0.330594773	0.151177893	0.30555563	0.13339275	-0.031065483	-0.002298945	-0.226787778	-0.202208003	0.141993946	-0.057289961	0.047336262	-0.066836259	-0.166227492	-0.138002049	0.094628023		-0.208580551	-0.270226409	0.208333333	0.556643814	0.542326145	0	-0.577350269	0.068802092	0.550560093	0.392756295	0.2335202	-0.073749613	0.029990704	0.039344474
v__p-Value	0.718474251	0.743788656	0.40615669	0.721760509	0.415793003	0.195851769	0.871097659	0.747801445	0.162269524	0.80779681	0.623818595	0.583566911	0.266093401	0.198204686		0.016918453	0.032843668	0	0.520453273	0.005896298	0.3215358	0.046309803	0.260557836	0.771308634	0.982842921	0.034656727	0.124570094	0.184386975	0.589611001	0.65957246	0.674085569	0.292749929	0.383456214	0.566635729		0.377505336	0.24920928	0.392051607	0.010798239	0.020060862	1	0.422649731	0.800126551	0.011885399	0.086715299	0.32174462	0.802155488	0.900116613	0.869190088
v__number	86	86	86	86	91	91	86	91	91	91	91	91	91	91	91	91	91	91	91	68	45	43	73	90	90	87	59	89	91	89	42	42	42	39	91	20	20	19	20	18	4	4	16	20	20	20	14	20	20
g__CORR	0.070810909	0.01380847	-0.101944692	-0.022213299	-0.091094526	-0.05348817	0.114912733	0.030480988	0.014531315	-0.055799328	-0.032245372	-0.052395629	0.199240131	0.112928865		0.118039962	0.206956634	0.068232352	1	0.424557982	0.40366307	0.443935924	0.186177281	0.661096032	0.363047684	0.318162918	0.17280352	-0.053962716	0.053231481	0.153515745	0.080889852	0.254637768	-0.341823941	0.081197125		-0.113909735	-0.14757569	0.544331054	0.512989176	1	0	-0.577350269	-0.147920052	0.383355719	0.21449155	0.042509915	-0.235003882	0.343948162	-0.085947009
g__p-Value	0.517063703	0.899584174	0.350304671	0.83912853	0.390472369	0.614576389	0.2920854	0.774252317	0.89125936	0.59934483	0.761563773	0.621834543	0.05830659	0.286516606		0.26512286	0.049031889	0.520453273	0	0.000308101	0.005964268	0.002863608	0.114780133	1.33E-12	0.000436743	0.002671968	0.190602028	0.61548973	0.616278372	0.150911172	0.610582915	0.103654003	0.026716662	0.623150177		0.632522005	0.534666998	0.015972972	0.020719543	0	1	0.422649731	0.58457997	0.095220723	0.363823315	0.858763208	0.418661798	0.137575191	0.718633775
g__number	86	86	86	86	91	91	86	91	91	91	91	91	91	91	91	91	91	91	91	68	45	43	73	90	90	87	59	89	91	89	42	42	42	39	91	20	20	19	20	18	4	4	16	20	20	20	14	20	20
ptc__CORR	0.055381862	0.227373615	-0.086283888	0.061677005	-0.006562251	-0.143191757	0.226611529	-0.153447859	0.207291667	-0.288770347	-0.304294429	-0.32213555	-0.032468352	-0.078059227		0.673841983	0.469435147	0.330594773	0.424557982	1	0.708914111	0.28644059	0.274683323	0.249239528	0.101879682	-0.148283193	-0.098148676	0.183419881	0.105441723	0.040672951	0.018466031	-0.043304977	-0.350698742	-0.193306629		0.185194633	-0.094629465	0.457509011	0.729591837	0.516397779	0	0	0.127293769	0.250489716	0.487810782	0.419245746	-0.038727858	0.674978999	0.04935486
ptc__p-Value	0.663811779	0.070780198	0.497814569	0.628277592	0.957643466	0.244054427	0.071755543	0.211548739	0.089856169	0.016929614	0.011639407	0.007384955	0.792669046	0.526912932	1	3.02E-10	5.38E-05	0.005896298	0.000308101	0	7.23E-08	0.062574827	0.033672565	0.041957567	0.408407226	0.234745342	0.467626666	0.137348124	0.392128608	0.741916973	0.907595662	0.785386387	0.022783045	0.238364755	1	0.492293654	0.727391904	0.074773229	0.001337542	0.040568593	1	1	0.664538928	0.349417191	0.055258422	0.105996892	0.9048835	0.004120871	0.85596366
ptc__number	64	64	64	64	68	68	64	68	68	68	68	68	68	68	68	68	68	68	68	68	44	43	60	67	68	66	57	67	68	68	42	42	42	39	68	16	16	16	16	16	4	4	14	16	16	16	12	16	16
ti__CORR	-0.110966469	0.011622122	-0.114768309	-0.081197665	0.046181134	-0.12388594	0.259830663	-0.155663314	0.158094837	-0.356881729	-0.358258315	-0.354443863	0.074816311	0.115878636		0.815764906	0.598447009	0.151177893	0.40366307	0.708914111	1	0.431305155	0.214727306	0.375957157	0.266936006	-0.060532073	-0.054554723	0.224316911	0.419241895	0.308930968	-0.009202269	-0.077849894	-0.296575311	-0.102601442			-0.544107188	0.72547625	0.688247202	0.72547625	0.866025404	0		0.917662935	0.552631579	0.573539335	0.25819889	0.405553553	0.573539335
ti__p-Value	0.48975636	0.942507324	0.474908344	0.613787305	0.763234843	0.417482494	0.100882233	0.307217629	0.299628823	0.016106008	0.015672482	0.016898716	0.625234305	0.448437745	1	8.74E-12	1.41E-05	0.3215358	0.005964268	7.23E-08	0	0.003881804	0.166738391	0.011901582	0.076296332	0.696297421	0.728248286	0.138507746	0.004149305	0.041307126	0.953876949	0.624102787	0.056497398	0.534242683	1	1	0.343110821	0.165370396	0.198892188	0.165370396	0.333333333	1	1	0.028008456	0.334034711	0.312036357	0.74180111	0.498159511	0.312036357
ti__number	41	41	41	41	45	45	41	45	45	45	45	45	45	45	45	45	45	45	45	44	45	43	43	44	45	44	43	45	45	44	42	42	42	39	45	5	5	5	5	5	3	3	4	5	5	5	4	5	5
i-IFTA__CORR	-0.22359477	-0.084761473	-0.262841905	-0.218754954	0.096285362	-0.002422339	0.062195625	0.022697647	0.340866962	-0.21793082	-0.237809342	-0.244182302	-0.069626562	-0.066297802		0.316215606	0.317274664	0.30555563	0.443935924	0.28644059	0.431305155	1	0.142608842	0.402651589	0.405573839	0.143962266	0.128451337	0.074035155	0.359246205	0.426040967	0.107769573	0.132891378	-0.272060006	0.059030215				0.774596669	0.632455532	0.774596669		-1		0.948683298	0.4	0.25819889	0	0.210818511	0.25819889
i-IFTA__p-Value	0.171213752	0.607924792	0.105962408	0.180913455	0.539076565	0.987700076	0.706813626	0.88512848	0.025298849	0.160349566	0.124638377	0.114561016	0.657290466	0.672734244	1	0.038847084	0.038162773	0.046309803	0.002863608	0.062574827	0.003881804	0	0.373755291	0.008201083	0.006971564	0.363045836	0.417535743	0.637052634	0.017986131	0.004391879	0.496927672	0.401483895	0.081336024	0.721120914	1	1	1	0.225403331	0.367544468	0.225403331	0	0	1	0.051316702	0.6	0.74180111	1	0.789181489	0.74180111
i-IFTA__number	39	39	39	39	43	43	39	43	43	43	43	43	43	43	43	43	43	43	43	43	43	43	41	42	43	42	42	43	43	43	42	42	42	39	43	4	4	4	4	4	2	2	3	4	4	4	3	4	4
C4d__CORR	-0.005144759	-0.104982287	-0.084974431	-0.119127882	0.108840508	0.100061664	-0.00251048	-0.339913041	-0.133686819	-0.043095944	-0.048957142	-0.051194926	-0.109306416	-0.104296956		0.152533393	0.126947349	0.13339275	0.186177281	0.274683323	0.214727306	0.142608842	1	0.299612817	0.207816813	0.078919145	-0.001224554	-0.026983883	-0.101789736	-0.035656138	0.158706765	0.086286287	-0.119266795	-0.019482068		0.118094373	-0.067419986	0.158113883	-0.061237244	0.516397779	0.5	-0.5	0.140859042	0.244948974	-0.138039408	-0.166666667	-0.049801192	0.244948974	-0.092318618
C4d__p-Value	0.966786896	0.39420637	0.490839879	0.333248054	0.359346928	0.399626706	0.983789565	0.003258495	0.259498861	0.717333411	0.680839957	0.667092135	0.357281471	0.37987243	1	0.197639569	0.284504465	0.260557836	0.114780133	0.033672565	0.166738391	0.373755291	0	0.010019342	0.077688579	0.516073341	0.992721071	0.823243613	0.391494661	0.767837315	0.328005781	0.596523381	0.463550604	0.907577559	1	0.714713891	0.835085077	0.623573522	0.850049938	0.103888131	0.666666667	0.666666667	0.69791208	0.442889634	0.668777722	0.604659944	0.891329679	0.442889634	0.775371636
C4d__number	68	68	68	68	73	73	68	73	73	73	73	73	73	73	73	73	73	73	73	60	43	41	73	73	73	70	58	71	73	71	40	40	40	38	73	12	12	12	12	11	3	3	10	12	12	12	10	12	12
cg__CORR	-0.016440109	0.041586626	-0.180279137	-0.071503309	0.00308445	0.064968888	0.073007907	0.032842073	0.066765828	-0.045195699	0.054297793	0.076565803	0.450661396	0.418026559		0.022211719	0.061425408	-0.031065483	0.661096032	0.249239528	0.375957157	0.402651589	0.299612817	1	0.461425797	0.568062582	0.363747499	-0.004422592	0.345382247	0.271179559	0.167586997	0.308049585	-0.302975296	0.162078716		0.047705848	0.436839319	0	0.262609041	0.285479561	0.833333333	0.23570226	0.165114547	0.499315811	0.285893991	-0.009728862	-0.074825492	0.070189165	0.196976637
cg__p-Value	0.881288368	0.705507561	0.098730483	0.515498262	0.976982075	0.542937697	0.506677228	0.758618887	0.531813167	0.672304864	0.611250816	0.473209139	8.30E-06	4.14E-05	1	0.835385944	0.56520312	0.771308634	1.33E-12	0.041957567	0.011901582	0.008201083	0.010019342	0	5.34E-06	9.55E-09	0.004626811	0.96737994	0.000856048	0.01060062	0.294949887	0.050063385	0.054164056	0.324237436	1	0.846224872	0.061470887	1	0.277398775	0.266688137	0.166666667	0.76429774	0.556486681	0.029515314	0.235405898	0.968468779	0.808050077	0.775238894	0.418931181
cg__number	85	85	85	85	90	90	85	90	90	90	90	90	90	90	90	90	90	90	90	67	44	42	73	90	89	87	59	88	90	88	41	41	41	39	90	19	19	18	19	17	4	4	15	19	19	19	13	19	19
mm__CORR	0.068033903	-0.116903584	-0.217046114	-0.109774185	-0.005794048	-0.024044052	0.158551118	0.011688576	-0.03082873	0.051825573	0.113118784	0.118020835	0.16871543	0.113410305		-0.04478642	-0.019860886	-0.002298945	0.363047684	0.101879682	0.266936006	0.405573839	0.207816813	0.461425797	1	0.225620069	0.012523933	0.138938636	0.277889343	0.232630526	0.241664986	0.257424413	-0.03861547	0.20693379		0.014676547	0.484316597	-0.129099445	0.026580525	0.232310684	-0.5	-0.707106781	0.060149803	0.377547737	0.293312756	-0.091929463	-0.180320915	-0.270260646	-0.040164279
mm__p-Value	0.536132542	0.286650636	0.046011075	0.317257596	0.956776416	0.822021366	0.147250867	0.912931828	0.773004338	0.627595407	0.288440097	0.26791789	0.111920592	0.287191297	1	0.675104662	0.852600478	0.982842921	0.000436743	0.408407226	0.076296332	0.006971564	0.077688579	5.34E-06	0	0.036733754	0.924995137	0.196705146	0.008004322	0.029177352	0.123108174	0.099800154	0.808164266	0.206233762	1	0.952447697	0.03561243	0.609668934	0.91398418	0.369586987	0.5	0.292893219	0.83137337	0.111024863	0.222937974	0.708179985	0.55551751	0.263119849	0.870320304
mm__number	85	85	85	85	90	90	85	90	90	90	90	90	90	90	90	90	90	90	90	68	45	43	73	89	90	86	59	88	90	88	42	42	42	39	90	19	19	18	19	17	4	4	15	19	19	19	13	19	19
ah__CORR	0.011938548	0.069714051	0.042956289	0.031081255	0.039260355	0.219878461	-0.201750359	0.036285448	-0.16099839	0.021850087	0.115086609	0.132107023	0.481269207	0.477548491		-0.188492653	-0.080550964	-0.226787778	0.318162918	-0.148283193	-0.060532073	0.143962266	0.078919145	0.568062582	0.225620069	1	0.712516341	-0.152828277	0.289933098	0.327782993	0.110980137	0.336232978	-0.17704123	0.10943983		-0.051437285	0.248876383	0.016428802	-0.10081845	-0.201206509	0.816496581	0.577350269	0.060160795	0.076741494	-0.095428402	-0.041522244	0.267415414	-0.066775759	0.284620758
ah__p-Value	0.915223538	0.533709131	0.701578132	0.781627414	0.718070366	0.040722731	0.069122272	0.738634011	0.136300573	0.84079222	0.28848002	0.222561896	2.37E-06	2.91E-06	1	0.080390902	0.458288056	0.034656727	0.002671968	0.234745342	0.696297421	0.363045836	0.516073341	9.55E-09	0.036733754	0	7.32E-10	0.160080916	0.006450155	0.002196118	0.489702552	0.031604574	0.268149199	0.507195035	1	0.834349697	0.304203377	0.948411722	0.681312893	0.438708394	0.183503419	0.422649731	0.831342962	0.754843175	0.697562921	0.865972885	0.377088196	0.785920948	0.237589823
ah__number	82	82	82	82	87	87	82	87	87	87	87	87	87	87	87	87	87	87	87	66	44	42	70	87	86	87	56	86	87	85	41	41	41	39	87	19	19	18	19	17	4	4	15	19	19	19	13	19	19
aah__CORR	-0.039803063	0.167092622	0.131868602	0.13400291	0.0082725	0.159084315	-0.188552369	-0.028279224	-0.036325158	-0.027326707	0.100404689	0.127217833	0.614091195	0.597283188		-0.130262584	-0.213210402	-0.202208003	0.17280352	-0.098148676	-0.054554723	0.128451337	-0.001224554	0.363747499	0.012523933	0.712516341	1	-0.085885148	0.398133794	0.177084449	0.25768984	0.256824485	0.071231611	0.203553449		0.487950036	0.149071198	0.149071198	-0.13012001	-0.292770022			0.471404521	0.073771111	-0.362638731	-0.06172134	0.7200823	-0.365148372	0.516397779
aah__p-Value	0.772947468	0.222721494	0.337205919	0.329374715	0.950416501	0.22878795	0.168010387	0.831629829	0.78474633	0.83722237	0.449267434	0.336964813	2.31E-07	5.92E-07	1	0.325432417	0.104939781	0.124570094	0.190602028	0.467626666	0.728248286	0.417535743	0.992721071	0.004626811	0.924995137	7.32E-10	0	0.521503611	0.001790798	0.179680338	0.10382297	0.105030066	0.658082152	0.213906952	1	0.219943819	0.724604764	0.724604764	0.758764857	0.481617814	1	1	0.285590941	0.862180191	0.377312416	0.884566063	0.068013114	0.373770543	0.190116149
aah__number	55	55	55	55	59	59	55	59	59	59	59	59	59	59	59	59	59	59	59	57	43	42	58	59	59	56	59	58	59	59	41	41	41	39	59	8	8	8	8	8	3	3	7	8	8	8	7	8	8
cv__CORR	-0.068339365	-0.276075899	-0.038479922	-0.119544353	0.159619588	0.053892021	0.089154563	0.071301747	0.06419057	0.001935636	-0.016082828	-0.009359718	-0.018425738	0.036805449		0.178209901	-0.000568392	0.141993946	-0.053962716	0.183419881	0.224316911	0.074035155	-0.026983883	-0.004422592	0.138938636	-0.152828277	-0.085885148	1	0.211664748	0.087178377	0.215297889	0.082821558	0.032739232	0.187804862		-0.044043674	0.010374683	-0.016074105	-0.320564691	-0.168283103			-0.113384855	0.037518902	-0.133699744	0.239078336	0.364540185	0.313186193	0.149542961
cv__p-Value	0.536787362	0.011022868	0.728201718	0.27875748	0.135134194	0.615953273	0.419966538	0.506692794	0.550087674	0.985636761	0.881088194	0.930629352	0.86392084	0.732027732	1	0.094748189	0.995782083	0.184386975	0.61548973	0.137348124	0.138507746	0.637052634	0.823243613	0.96737994	0.196705146	0.160080916	0.521503611	0	0.046454994	0.422023896	0.170904832	0.602057405	0.836926511	0.252248474	1	0.853719025	0.965374367	0.947925174	0.168206668	0.504456602	1	1	0.675872448	0.875213048	0.574145575	0.310026724	0.200029428	0.178771976	0.529173191
cv__number	84	84	84	84	89	89	84	89	89	89	89	89	89	89	89	89	89	89	89	67	45	43	71	88	88	86	58	89	89	87	42	42	42	39	89	20	20	19	20	18	4	4	16	20	20	20	14	20	20
ci__CORR	0.04341689	0.07883728	0.073681266	0.107414199	0.007367033	0.031451372	0.059210102	0.07437638	0.00588792	-0.040407416	0.02662167	0.042360077	0.420449696	0.425070763		0.228021104	0.119993633	-0.057289961	0.053231481	0.105441723	0.419241895	0.359246205	-0.101789736	0.345382247	0.277889343	0.289933098	0.398133794	0.211664748	1	0.420740004	0.313909251	0.280787308	-0.081977575	0.01787607		0.207145096	0.172340955	-0.189036911	0.062074339	-0.257087248	0.707106781	1	0.184847159	0.277555853	0.24769489	0.263358956	0.29379191	0.038366227	0.610609417
ci__p-Value	0.691421135	0.470581838	0.500177431	0.324921952	0.944745698	0.767266237	0.58814061	0.483509802	0.95582681	0.703730914	0.802209755	0.690127286	3.33E-05	2.67E-05		0.029717372	0.257238762	0.589611001	0.616278372	0.392128608	0.004149305	0.017986131	0.391494661	0.000856048	0.008004322	0.006450155	0.001790798	0.046454994	0	4.04E-05	0.042922602	0.07166766	0.605775942	0.913985853		0.380871078	0.467489932	0.438292021	0.794878893	0.30307286	0.292893219	0	0.493120477	0.236096545	0.292377725	0.261909259	0.307961771	0.872416697	0.004242139
ci__number	86	86	86	86	91	91	86	91	91	91	91	91	91	91	91	91	91	91	91	68	45	43	73	90	90	87	59	89	91	89	42	42	42	39	91	20	20	19	20	18	4	4	16	20	20	20	14	20	20
ct__CORR	-0.219559059	-0.001088279	-0.034339567	-0.111433459	0.137224703	0.078176839	0.079070911	0.013623969	0.00640789	-0.168141876	-0.089954332	-0.098072871	0.425545994	0.384866186		0.078351197	0.008495452	0.047336262	0.153515745	0.040672951	0.308930968	0.426040967	-0.035656138	0.271179559	0.232630526	0.327782993	0.177084449	0.087178377	0.420740004	1	0.052299017	0.251395793	-0.098610337	0.200116772		-0.113689379	-0.493102002	-0.046635913	0.197873163	0.113031638	0.816496581	0.577350269	-0.289047234	0.16195048	-0.032576877	-0.043811191	0.017764624	-0.204690366	0.361770972
ct__p-Value	0.044781872	0.992161079	0.756482651	0.312903374	0.199719766	0.466486026	0.474634589	0.89916425	0.952475868	0.115242753	0.401844158	0.360535606	3.22E-05	0.00019608	1	0.465489495	0.937021201	0.65957246	0.150911172	0.741916973	0.041307126	0.004391879	0.767837315	0.01060062	0.029177352	0.002196118	0.179680338	0.422023896	4.04E-05	0	0.742206357	0.108279558	0.534402877	0.22190815	1	0.633184808	0.027161288	0.849635881	0.40301325	0.655192172	0.183503419	0.422649731	0.277571585	0.495141296	0.891550156	0.85448326	0.951935893	0.386665579	0.117033423
ct__number	84	84	84	84	89	89	84	89	89	89	89	89	89	89	89	89	89	89	89	68	44	43	71	88	88	85	59	87	89	89	42	42	42	39	89	20	20	19	20	18	4	4	16	20	20	20	14	20	20
Glomeruli Global Sclerosis__CORR	0.054318367	0.01927763	-0.036951805	-0.014043251	-0.000361937	0.075753545	-0.143590704	-0.139593784	-0.221506522	0.035013329	0.061928846	0.067203077	0.16954287	0.195062533		-0.028743304	-0.165551869	-0.066836259	0.080889852	0.018466031	-0.009202269	0.107769573	0.158706765	0.167586997	0.241664986	0.110980137	0.25768984	0.215297889	0.313909251	0.052299017	1	0.379241938	0.0236682	0.382507322				-0.544331054	-0.388888889	-0.544331054		1		-0.055555556	0.210818511	0.816496581	0.866025404	-0.5	0.816496581
Glomeruli Global Sclerosis__p-Value	0.746017722	0.908543307	0.825674829	0.933310376	0.99818495	0.633497881	0.389759612	0.377940406	0.158602701	0.825768503	0.696827094	0.672396839	0.283092221	0.215741191	1	0.856608156	0.294743805	0.674085569	0.610582915	0.907595662	0.953876949	0.496927672	0.328005781	0.294949887	0.123108174	0.489702552	0.10382297	0.170904832	0.042922602	0.742206357	0	0.013252789	0.881727887	0.016251157	1	1	1	0.455668946	0.611111111	0.455668946	0	0	1	0.944444444	0.789181489	0.183503419	0.333333333	0.5	0.183503419
Glomeruli Global Sclerosis__number	38	38	38	38	42	42	38	42	42	42	42	42	42	42	42	42	42	42	42	42	42	42	40	41	42	41	41	42	42	42	42	42	42	39	42	4	4	4	4	4	2	2	3	4	4	4	3	4	4
Glomeruli Segmental Sclerosis__CORR	0.123909384	-0.14348524	-0.184075159	-0.07597782	0.084203249	0.226854623	0.015854386	0.144337567	-0.008664587	-0.089922515	-0.078694985	-0.084340043	0.275097387	0.224569295		-0.240186777	-0.119646027	-0.166227492	0.254637768	-0.043304977	-0.077849894	0.132891378	0.086286287	0.308049585	0.257424413	0.336232978	0.256824485	0.082821558	0.280787308	0.251395793	0.379241938	1	-0.042274971	0.161100062
Glomeruli Segmental Sclerosis__p-Value	0.458586478	0.39011156	0.26859818	0.650282715	0.595991226	0.148533595	0.924732605	0.361782938	0.95656924	0.571171615	0.620331847	0.595392108	0.077861934	0.152777217	1	0.125488104	0.450421945	0.292749929	0.103654003	0.785386387	0.624102787	0.401483895	0.596523381	0.050063385	0.099800154	0.031604574	0.105030066	0.602057405	0.07166766	0.108279558	0.013252789	0	0.790374917	0.32720671	1	1	1	1	1	1	0	0	1	1	1	1	1	1	1
Glomeruli Segmental Sclerosis__number	38	38	38	38	42	42	38	42	42	42	42	42	42	42	42	42	42	42	42	42	42	42	40	41	42	41	41	42	42	42	42	42	42	39	42	4	4	4	4	4	2	2	3	4	4	4	3	4	4
Glomeruli total number__CORR	0.1046125	0.145259546	0.142814167	0.15508135	0.099834047	0.184790855	0.003110962	0.412137499	-0.137706058	0.06724532	0.034707645	0.043070913	-0.110180711	-0.048336294		-0.212044854	-0.291662118	-0.138002049	-0.341823941	-0.350698742	-0.296575311	-0.272060006	-0.119266795	-0.302975296	-0.03861547	-0.17704123	0.071231611	0.032739232	-0.081977575	-0.098610337	0.0236682	-0.042274971	1	-0.055176755				-0.25819889	-0.737864787	-0.25819889		-1		-0.105409255	-1	0.25819889	0.866025404	-0.737864787	0.25819889
Glomeruli total number__p-Value	0.53193731	0.384215114	0.392355352	0.352530406	0.529317841	0.241372428	0.985210735	0.006686683	0.384487107	0.672202468	0.827266447	0.786519273	0.48729167	0.761143803	1	0.177618333	0.06091385	0.383456214	0.026716662	0.022783045	0.056497398	0.081336024	0.463550604	0.054164056	0.808164266	0.268149199	0.658082152	0.836926511	0.605775942	0.534402877	0.881727887	0.790374917	0	0.738664816	1	1	1	0.74180111	0.262135213	0.74180111	0	0	1	0.894590745	0	0.74180111	0.333333333	0.262135213	0.74180111
Glomeruli total number__number	38	38	38	38	42	42	38	42	42	42	42	42	42	42	42	42	42	42	42	42	42	42	40	41	42	41	41	42	42	42	42	42	42	39	42	4	4	4	4	4	2	2	3	4	4	4	3	4	4
Maximum intimal Elastosis in Arcuata or interlobular Artery (0=none, 1=minor if 2 elastica layers and/or up to 10% luminal stenosis, 2=moderate if 3 layers and/or 11-20% stenosis, 3=severe if 4 or more layers and/or > 21% stenosis)__CORR	-0.01358465	-0.111649911	-0.096020165	-0.059469266	-0.12437959	-0.190600571	-0.065501767	0.017670591	-0.14932786	0.252290979	0.258703321	0.251885556	0.168788074	0.135966676		-0.117097775	-0.321620513	0.094628023	0.081197125	-0.193306629	-0.102601442	0.059030215	-0.019482068	0.162078716	0.20693379	0.10943983	0.203553449	0.187804862	0.01787607	0.200116772	0.382507322	0.161100062	-0.055176755	1				-0.866025404	-1	-0.866025404		1		-0.866025404	-0.5			-0.866025404
Maximum intimal Elastosis in Arcuata or interlobular Artery (0=none, 1=minor if 2 elastica layers and/or up to 10% luminal stenosis, 2=moderate if 3 layers and/or 11-20% stenosis, 3=severe if 4 or more layers and/or > 21% stenosis)__p-Value	0.937323061	0.516797834	0.57747377	0.73044916	0.450600004	0.245127439	0.704280504	0.914970936	0.364241351	0.121266174	0.11177988	0.121885625	0.304336029	0.409185238	1	0.477746877	0.045871759	0.566635729	0.623150177	0.238364755	0.534242683	0.721120914	0.907577559	0.324237436	0.206233762	0.507195035	0.213906952	0.252248474	0.913985853	0.22190815	0.016251157	0.32720671	0.738664816	0	1	1	1	0.333333333	0	0.333333333	0	0	0	0.333333333	0.666666667	1	0	0.333333333	1
Maximum intimal Elastosis in Arcuata or interlobular Artery (0=none, 1=minor if 2 elastica layers and/or up to 10% luminal stenosis, 2=moderate if 3 layers and/or 11-20% stenosis, 3=severe if 4 or more layers and/or > 21% stenosis)__number	36	36	36	36	39	39	36	39	39	39	39	39	39	39	39	39	39	39	39	39	39	39	38	39	39	39	39	39	39	39	39	39	39	39	39	3	3	3	3	3	2	2	2	3	3	3	2	3	3
Biopsy 2__CORR
Biopsy 2__p-Value	1	1	1	1			1													1	1	1	1	1	1	1	1	1		1	1	1	1	1		1	1	1	1	1	1	1	1	1	1	1	1	1	1
Biopsy 2__number	86	86	86	86	91	91	86	91	91	91	91	91	91	91	91	91	91	91	91	68	45	43	73	90	90	87	59	89	91	89	42	42	42	39	91	20	20	19	20	18	4	4	16	20	20	20	14	20	20
i2__CORR	-0.133368303	-0.050957896	0.045848623	-0.106214316	-0.16252822	-0.399621787	0.166974354	-0.065061933	0.558575812	-0.160738506	-0.181098633	-0.266057538	0.217503641	-0.383179114		0.204982487	0.10824362	-0.208580551	-0.113909735	0.185194633			0.118094373	0.047705848	0.014676547	-0.051437285	0.487950036	-0.044043674	0.207145096	-0.113689379						1	0.410556747	0.24891067	0.044718595	-0.085600809			0.447222667	-0.390442833	-0.464220837	-0.175381804	-0.235003882	0.047854404	0.129047087
i2__p-Value	0.58622536	0.835873471	0.852147441	0.665178805	0.493583165	0.080867304	0.494458929	0.785222864	0.010470388	0.498417704	0.444807492	0.256870964	0.35696187	0.095386138	1	0.38597345	0.649649419	0.377505336	0.632522005	0.492293654	1	1	0.714713891	0.846224872	0.952447697	0.834349697	0.219943819	0.853719025	0.380871078	0.633184808	1	1	1	1	1	0	0.072164026	0.304134574	0.851501083	0.735573076	1	1	0.082410904	0.088754421	0.039213307	0.459548502	0.418661798	0.841210433	0.58765872
i2__number	19	19	19	19	20	20	19	20	20	20	20	20	20	20	20	20	20	20	20	16	5	4	12	19	19	19	8	20	20	20	4	4	4	3	20	20	20	19	20	18	4	4	16	20	20	20	14	20	20
t2__CORR	0.046024916	-0.069801635	-0.339136216	-0.13539603	-0.371855787	-0.517729771	0.213471871	-0.011238793	0.280944576	0.266944519	0.263950005	0.307011947	-0.017204799	-0.053919089		-0.286641523	-0.17747249	-0.270226409	-0.14757569	-0.094629465	-0.544107188		-0.067419986	0.436839319	0.484316597	0.248876383	0.149071198	0.010374683	0.172340955	-0.493102002						0.410556747	1	-0.048065698	-0.067923968	-0.148398517	0	0	0.464144228	-0.044787738	0.070165787	0.041221663	-0.127825779	0.151550042	0.114470294
t2__p-Value	0.851584926	0.776449741	0.15548885	0.580491698	0.106436419	0.019380176	0.380209832	0.962492256	0.230187676	0.255228476	0.260800465	0.187952435	0.942607596	0.821379774	1	0.220472281	0.454128841	0.24920928	0.534666998	0.727391904	0.343110821	1	0.835085077	0.061470887	0.03561243	0.304203377	0.724604764	0.965374367	0.467489932	0.027161288	1	1	1	1	1	0.072164026	0	0.845078238	0.776000867	0.556753088	1	1	0.070127073	0.851273923	0.768797355	0.863004057	0.663212178	0.523595402	0.630837131
t2__number	19	19	19	19	20	20	19	20	20	20	20	20	20	20	20	20	20	20	20	16	5	4	12	19	19	19	8	20	20	20	4	4	4	3	20	20	20	19	20	18	4	4	16	20	20	20	14	20	20
v2__CORR	0	-0.054772256	-0.197948664	-0.166209418	0.184466197	0.030270132	0.478091444	0.267724835	0.460628168	-0.383118086	-0.356382018	-0.395631905	0.290002674	-0.079056942		0.412483919	0.354722165	0.208333333	0.544331054	0.457509011	0.72547625	0.774596669	0.158113883	0	-0.129099445	0.016428802	0.149071198	-0.016074105	-0.189036911	-0.046635913	-0.544331054		-0.25819889	-0.866025404		0.24891067	-0.048065698	1	0.166540465	0.542326145	0	-0.577350269	-0.275208366	0	-0.154828578	0.377771656	0.086479087	0.624045196	0.358959603
v2__p-Value	1	0.829098865	0.431064271	0.509798729	0.449645666	0.902095734	0.044769317	0.267799944	0.047174789	0.105430601	0.13422267	0.093608542	0.228446692	0.747672018	1	0.079253882	0.136175354	0.392051607	0.015972972	0.074773229	0.165370396	0.225403331	0.623573522	1	0.609668934	0.948411722	0.724604764	0.947925174	0.438292021	0.849635881	0.455668946	1	0.74180111	0.333333333	1	0.304134574	0.845078238	0	0.495597342	0.020060862	1	0.422649731	0.302244505	1	0.526799098	0.110795962	0.768790295	0.004295772	0.131229458
v2__number	18	18	18	18	19	19	18	19	19	19	19	19	19	19	19	19	19	19	19	16	5	4	12	18	18	18	8	19	19	19	4	4	4	3	19	19	19	19	19	18	4	4	16	19	19	19	14	19	19
g2__CORR	0.001972015	0.454596915	-0.186569132	0.050922277	-0.09479149	-0.186217415	0.430324038	-0.364627846	0.293511843	-0.2083655	-0.194183909	-0.264106776	0.34051566	0.008617408		0.405396884	0.457789141	0.556643814	0.512989176	0.729591837	0.688247202	0.632455532	-0.061237244	0.262609041	0.026580525	-0.10081845	-0.13012001	-0.320564691	0.062074339	0.197873163	-0.388888889		-0.737864787	-1		0.044718595	-0.067923968	0.166540465	1	0.514495755	0	-0.23570226	0.28644595	0.280847239	0.39489206	0.109338507	-0.150970271	0.212850286	-0.186157293
g2__p-Value	0.993607252	0.050531064	0.444403275	0.835986712	0.690982859	0.431820841	0.065901269	0.11395772	0.209118396	0.378008499	0.412015306	0.260506865	0.141805426	0.971236734	1	0.076178938	0.042388768	0.010798239	0.020719543	0.001337542	0.198892188	0.367544468	0.850049938	0.277398775	0.91398418	0.681312893	0.758764857	0.168206668	0.794878893	0.40301325	0.611111111	1	0.262135213	0	1	0.851501083	0.776000867	0.495597342	0	0.028919289	1	0.76429774	0.282113435	0.230356048	0.08486366	0.646326266	0.606425463	0.367593547	0.431972199
g2__number	19	19	19	19	20	20	19	20	20	20	20	20	20	20	20	20	20	20	20	16	5	4	12	19	19	19	8	20	20	20	4	4	4	3	20	20	20	19	20	18	4	4	16	20	20	20	14	20	20
ptc2__CORR	0	-0.029704426	-0.375734575	-0.270419139	0.0233741	-0.212831537	0.453742606	-0.193476497	0.445566394	-0.328255254	-0.304492423	-0.350973896	-0.023386171	-0.350611506		0.427092918	0.454398209	0.542326145	1	0.516397779	0.72547625	0.774596669	0.516397779	0.285479561	0.232310684	-0.201206509	-0.292770022	-0.168283103	-0.257087248	0.113031638	-0.544331054		-0.25819889	-0.866025404		-0.085600809	-0.148398517	0.542326145	0.514495755	1	0	-0.577350269	-0.133630621	0.387083348	0.198029509	0	-0.235003882	0.334829399	-0.103417538
ptc2__p-Value	1	0.906857877	0.124389641	0.2777854	0.926650011	0.396482366	0.058578556	0.441754828	0.06386439	0.183552695	0.21924342	0.153274796	0.92661223	0.153728945	1	0.077105271	0.058169376	0.020060862	0	0.040568593	0.165370396	0.225403331	0.103888131	0.266688137	0.369586987	0.438708394	0.481617814	0.504456602	0.30307286	0.655192172	0.455668946	1	0.74180111	0.333333333	1	0.735573076	0.556753088	0.020060862	0.028919289	0	1	0.422649731	0.634937555	0.112524072	0.430872271	1	0.418661798	0.174410173	0.683007862
ptc2__number	18	18	18	18	18	18	18	18	18	18	18	18	18	18	18	18	18	18	18	16	5	4	11	17	17	17	8	18	18	18	4	4	4	3	18	18	18	18	18	18	4	4	15	18	18	18	14	18	18
ti2__CORR	-0.833333333	0	0	-0.632455532	-0.316227766	0	-0.707106781		-0.5	-0.316227766	-0.632455532	0	0.948683298	0.948683298		0	0	0	0	0	0.866025404		0.5	0.833333333	-0.5	0.816496581			0.707106781	0.816496581							0	0	0	0	1	0.707106781		0.707106781	0.833333333	1		0	1
ti2__p-Value	0.166666667	1	1	0.367544468	0.683772234	1	0.292893219	1	0.5	0.683772234	0.367544468	1	0.051316702	0.051316702	1	1	1	1	1	1	0.333333333	0	0.666666667	0.166666667	0.5	0.183503419	1	1	0.292893219	0.183503419	0	0	0	0	1	1	1	1	1	1	0	0.292893219	1	0.292893219	0.166666667	0	1	1	0
ti2__number	4	4	4	4	4	4	4	4	4	4	4	4	4	4	4	4	4	4	4	4	3	2	3	4	4	4	3	4	4	4	2	2	2	2	4	4	4	4	4	4	4	4	4	4	4	4	4	4	4
i-IFTA2__CORR	-0.23570226	0.577350269	0.577350269	0	0	0.577350269	-1		-0.942809042	0.447213595	0	0.23570226	0.894427191	0.894427191		-0.23570226	-0.23570226	-0.577350269	-0.577350269	0	0	-1	-0.5	0.23570226	-0.707106781	0.577350269			1	0.577350269	1		-1	1			0	-0.577350269	-0.23570226	-0.577350269	0.707106781	1		0	0.942809042	0.707106781		0	0.707106781
i-IFTA2__p-Value	0.76429774	0.422649731	0.422649731	1	1	0.422649731	0	1	0.057190958	0.552786405	1	0.76429774	0.105572809	0.105572809	1	0.76429774	0.76429774	0.422649731	0.422649731	1	1	0	0.666666667	0.76429774	0.292893219	0.422649731	1	1	0	0.422649731	0	0	0	0	1	1	1	0.422649731	0.76429774	0.422649731	0.292893219	0	1	1	0.057190958	0.292893219	1	1	0.292893219
i-IFTA2__number	4	4	4	4	4	4	4	4	4	4	4	4	4	4	4	4	4	4	4	4	3	2	3	4	4	4	3	4	4	4	2	2	2	2	4	4	4	4	4	4	4	4	4	4	4	4	4	4	4
C4d2__CORR	-0.125	0.199204768	0.132221471	0.062894326	-0.353414715	-0.436984795	0.075377836	-0.166410059	-0.059347442	0.17930964	0.171133693	0.141963177	0.067964368	0.007767356		-0.207606108	0.053881313	0.068802092	-0.147920052	0.127293769			0.140859042	0.165114547	0.060149803	0.060160795	0.471404521	-0.113384855	0.184847159	-0.289047234						0.447222667	0.464144228	-0.275208366	0.28644595	-0.133630621			1	0.018286548	0.009233611	0.024806947	0.36826252	-0.041406928	-0.222632615
C4d2__p-Value	0.657135668	0.476608487	0.638542862	0.823788023	0.179334278	0.090554295	0.789477249	0.537918044	0.827176218	0.50638568	0.526270671	0.599959476	0.802515143	0.977224066	1	0.440395072	0.842900239	0.800126551	0.58457997	0.664538928	1	1	0.69791208	0.556486681	0.83137337	0.831342962	0.285590941	0.675872448	0.493120477	0.277571585	1	1	1	0	1	0.082410904	0.070127073	0.302244505	0.282113435	0.634937555	1	1	0	0.946408402	0.972925971	0.927340176	0.215681719	0.878984657	0.407234479
C4d2__number	15	15	15	15	16	16	15	16	16	16	16	16	16	16	16	16	16	16	16	14	4	3	10	15	15	15	7	16	16	16	3	3	3	2	16	16	16	16	16	15	4	4	16	16	16	16	13	16	16
cg2__CORR	-0.193205793	0.174063184	-0.208052317	-0.110901955	-0.271038587	-0.275902449	0.210934186	-0.288514178	-0.203212777	-0.030325934	-0.040546341	0.052883778	0.206339655	0.482414592		0.228985507	0.435836629	0.550560093	0.383355719	0.250489716	0.917662935	0.948683298	0.244948974	0.499315811	0.377547737	0.076741494	0.073771111	0.037518902	0.277555853	0.16195048	-0.055555556		-0.105409255	-0.866025404		-0.390442833	-0.044787738	0	0.280847239	0.387083348	0.707106781	0	0.018286548	1	0.782071344	0.510892731	0.315941574	-0.065262435	0.283088691
cg2__p-Value	0.428068653	0.476041264	0.39270501	0.651275541	0.247733813	0.239014808	0.386032756	0.217338324	0.39017705	0.899005576	0.865228626	0.824758056	0.382766962	0.031222211	1	0.331497665	0.054740882	0.011885399	0.095220723	0.349417191	0.028008456	0.051316702	0.442889634	0.029515314	0.111024863	0.754843175	0.862180191	0.875213048	0.236096545	0.495141296	0.944444444	1	0.894590745	0.333333333	1	0.088754421	0.851273923	1	0.230356048	0.112524072	0.292893219	1	0.946408402	0	4.63E-05	0.021334855	0.271147695	0.784575896	0.226499087
cg2__number	19	19	19	19	20	20	19	20	20	20	20	20	20	20	20	20	20	20	20	16	5	4	12	19	19	19	8	20	20	20	4	4	4	3	20	20	20	19	20	18	4	4	16	20	20	20	14	20	20
mm2__CORR	0.148000074	0.408270375	-0.196494373	0.178959501	-0.351844606	-0.269954401	0.214019012	-0.352832671	-0.252029374	0.253511456	0.241141343	0.295317602	0.042983361	0.397243909		0.165420496	0.421923634	0.392756295	0.21449155	0.487810782	0.552631579	0.4	-0.138039408	0.285893991	0.293312756	-0.095428402	-0.362638731	-0.133699744	0.24769489	-0.032576877	0.210818511		-1	-0.5		-0.464220837	0.070165787	-0.154828578	0.39489206	0.198029509	0.833333333	0.942809042	0.009233611	0.782071344	1	0.518860784	0.209965786	0.100121822	0.135727003
mm2__p-Value	0.545400813	0.082679668	0.420093946	0.463522824	0.12818265	0.249704684	0.378960836	0.127040295	0.283737796	0.280820207	0.305743846	0.206199682	0.857205581	0.082858647	1	0.485819088	0.063879924	0.086715299	0.363823315	0.055258422	0.334034711	0.6	0.668777722	0.235405898	0.222937974	0.697562921	0.377312416	0.574145575	0.292377725	0.891550156	0.789181489	1	0	0.666666667	1	0.039213307	0.768797355	0.526799098	0.08486366	0.430872271	0.166666667	0.057190958	0.972925971	4.63E-05	0	0.019071065	0.471237695	0.674495989	0.568300026
mm2__number	19	19	19	19	20	20	19	20	20	20	20	20	20	20	20	20	20	20	20	16	5	4	12	19	19	19	8	20	20	20	4	4	4	3	20	20	20	19	20	18	4	4	16	20	20	20	14	20	20
ah2__CORR	-0.03827085	-0.104324443	-0.151376684	-0.07993057	-0.235385029	-0.054061309	0.200230662	0.106833886	-0.221887252	0.069245491	0.049481219	0.118585072	0.157518156	0.514954961		0.271383305	0.478354333	0.2335202	0.042509915	0.419245746	0.573539335	0.25819889	-0.166666667	-0.009728862	-0.091929463	-0.041522244	-0.06172134	0.239078336	0.263358956	-0.043811191	0.816496581		0.25819889			-0.175381804	0.041221663	0.377771656	0.109338507	0	1	0.707106781	0.024806947	0.510892731	0.518860784	1	0.781955395	0.500045279	0.601336889
ah2__p-Value	0.87638789	0.670814102	0.536165597	0.744971422	0.317784044	0.820915936	0.411130669	0.653937577	0.347110373	0.771752321	0.835881429	0.618523408	0.507174367	0.020155487	1	0.247109263	0.032883995	0.32174462	0.858763208	0.105996892	0.312036357	0.74180111	0.604659944	0.968468779	0.708179985	0.865972885	0.884566063	0.310026724	0.261909259	0.85448326	0.183503419	1	0.74180111	1	1	0.459548502	0.863004057	0.110795962	0.646326266	1	0	0.292893219	0.927340176	0.021334855	0.019071065	0	0.000952155	0.024754429	0.005038552
ah2__number	19	19	19	19	20	20	19	20	20	20	20	20	20	20	20	20	20	20	20	16	5	4	12	19	19	19	8	20	20	20	4	4	4	3	20	20	20	19	20	18	4	4	16	20	20	20	14	20	20
aah2__CORR	-0.200160192	-0.033140017	0.216263489	0.032227687	0.105096931	0.23982242	-0.073749613	0.133972825	-0.528395949	0.188712839	0.150303733	0.139184324	0.052548465	0.480443113		-0.043874844	0.09207036	-0.073749613	-0.235003882	-0.038727858	0.25819889	0	-0.049801192	-0.074825492	-0.180320915	0.267415414	0.7200823	0.364540185	0.29379191	0.017764624	0.866025404		0.866025404			-0.235003882	-0.127825779	0.086479087	-0.150970271	-0.235003882			0.36826252	0.315941574	0.209965786	0.781955395	1	0.131870244	0.329235651
aah2__p-Value	0.492650211	0.910452933	0.457725144	0.912909474	0.720667807	0.408902324	0.802155488	0.647949739	0.05208468	0.518206376	0.60803417	0.635109797	0.858402166	0.082054679	1	0.881609603	0.754248344	0.802155488	0.418661798	0.9048835	0.74180111	1	0.891329679	0.808050077	0.55551751	0.377088196	0.068013114	0.200029428	0.307961771	0.951935893	0.333333333	1	0.333333333	0	1	0.418661798	0.663212178	0.768790295	0.606425463	0.418661798	1	1	0.215681719	0.271147695	0.471237695	0.000952155	0	0.653156127	0.250372968
aah2__number	14	14	14	14	14	14	14	14	14	14	14	14	14	14	14	14	14	14	14	12	4	3	10	13	13	13	7	14	14	14	3	3	3	2	14	14	14	14	14	14	4	4	13	14	14	14	14	14	14
cv2__CORR	0.205196723	-0.021379005	-0.117894682	-0.005016461	0.07428582	0.084034552	0.257613688	0.246969739	0.167913288	0.106096881	0.092997226	0.05389776	0.096607892	-0.059428656		0.25473402	0.23846881	0.029990704	0.343948162	0.674978999	0.405553553	0.210818511	0.244948974	0.070189165	-0.270260646	-0.066775759	-0.365148372	0.313186193	0.038366227	-0.204690366	-0.5		-0.737864787	-0.866025404		0.047854404	0.151550042	0.624045196	0.212850286	0.334829399	0	0	-0.041406928	-0.065262435	0.100121822	0.500045279	0.131870244	1	0.324963319
cv2__p-Value	0.39937859	0.930773414	0.630739887	0.983738838	0.755606528	0.724658682	0.286974284	0.293838756	0.479176207	0.656183587	0.696563276	0.821449343	0.685349175	0.803453945	1	0.278427562	0.311299015	0.900116613	0.137575191	0.004120871	0.498159511	0.789181489	0.442889634	0.775238894	0.263119849	0.785920948	0.373770543	0.178771976	0.872416697	0.386665579	0.5	1	0.262135213	0.333333333	1	0.841210433	0.523595402	0.004295772	0.367593547	0.174410173	1	1	0.878984657	0.784575896	0.674495989	0.024754429	0.653156127	0	0.162116239
cv2__number	19	19	19	19	20	20	19	20	20	20	20	20	20	20	20	20	20	20	20	16	5	4	12	19	19	19	8	20	20	20	4	4	4	3	20	20	20	19	20	18	4	4	16	20	20	20	14	20	20
ci2__CORR	-0.304083573	-0.208072126	-0.170444798	-0.298184205	-0.207091338	-0.092812257	-0.128896085	0.255270263	-0.080971821	0.007325649	-0.013420224	0.045919482	0.33268942	0.441794855		0.362261463	0.112125719	0.039344474	-0.085947009	0.04935486	0.573539335	0.25819889	-0.092318618	0.196976637	-0.040164279	0.284620758	0.516397779	0.149542961	0.610609417	0.361770972	0.816496581		0.25819889			0.129047087	0.114470294	0.358959603	-0.186157293	-0.103417538	1	0.707106781	-0.222632615	0.283088691	0.135727003	0.601336889	0.329235651	0.324963319	1
ci2__p-Value	0.205614355	0.392658931	0.485399313	0.21498911	0.380997452	0.697139418	0.598954621	0.277382106	0.734339764	0.975547038	0.955218489	0.847557359	0.151789899	0.05114687	1	0.116501176	0.637895809	0.869190088	0.718633775	0.85596366	0.312036357	0.74180111	0.775371636	0.418931181	0.870320304	0.237589823	0.190116149	0.529173191	0.004242139	0.117033423	0.183503419	1	0.74180111	1	1	0.58765872	0.630837131	0.131229458	0.431972199	0.683007862	0	0.292893219	0.407234479	0.226499087	0.568300026	0.005038552	0.250372968	0.162116239	0
ci2__number	19	19	19	19	20	20	19	20	20	20	20	20	20	20	20	20	20	20	20	16	5	4	12	19	19	19	8	20	20	20	4	4	4	3	20	20	20	19	20	18	4	4	16	20	20	20	14	20	20
ct2__CORR	-0.292586492	-0.306361752	-0.258143277	-0.370919829	-0.312667314	-0.209180924	-0.088302434	0.255270263	-0.080971821	-0.035000322	-0.066287772	-0.001625468	0.227073731	0.325661281		0.362261463	0.208101643	0.039344474	-0.085947009	0.100064298	0.573539335	0.25819889	-0.092318618	0.020376894	-0.040164279	0.118730687	0.13012001	0.031721234	0.513035533	0.252680241	0.816496581		0.25819889			0.265069692	0.218899335	0.358959603	-0.186157293	-0.075584897	1	0.707106781	-0.027700832	0.169392908	0.056042117	0.601336889	0.266225399	0.324963319	0.925877193
ct2__p-Value	0.224139175	0.202067474	0.285949639	0.117954635	0.179531535	0.376102613	0.719240359	0.277382106	0.734339764	0.883533188	0.781269537	0.99457346	0.33566118	0.161163997	1	0.116501176	0.378626376	0.869190088	0.718633775	0.71233885	0.312036357	0.74180111	0.775371636	0.934011418	0.870320304	0.628301661	0.758764857	0.89438316	0.020706099	0.282454215	0.183503419	1	0.74180111	1	1	0.258708104	0.35380796	0.131229458	0.431972199	0.765639051	0	0.292893219	0.91888859	0.475254812	0.814461725	0.005038552	0.357567098	0.162116239	4.89E-09
ct2__number	19	19	19	19	20	20	19	20	20	20	20	20	20	20	20	20	20	20	20	16	5	4	12	19	19	19	8	20	20	20	4	4	4	3	20	20	20	19	20	18	4	4	16	20	20	20	14	20	20
Glomeruli Global Sclerosis2__CORR	0.5	1	1	0.866025404	0.866025404	1	-1		-0.866025404	0.866025404	0	0	0.866025404	0.866025404		0	0	-0.5	-0.5	0.5	0	-1	-0.5	-0.5	-0.866025404				1	0.5	1		-1	1			-0.5	-0.5	0	-0.5	0.5	1		-0.5	0.866025404	0.5		0.5	0.5
Glomeruli Global Sclerosis2__p-Value	0.666666667	0	0	0.333333333	0.333333333	0	0	1	0.333333333	0.333333333	1	1	0.333333333	0.333333333	1	1	1	0.666666667	0.666666667	0.666666667	1	0	0.666666667	0.666666667	0.333333333	1	1	1	0	0.666666667	0	0	0	0	1	1	0.666666667	0.666666667	1	0.666666667	0.666666667	0	1	0.666666667	0.333333333	0.666666667	1	0.666666667	0.666666667
Glomeruli Global Sclerosis2__number	3	3	3	3	3	3	3	3	3	3	3	3	3	3	3	3	3	3	3	3	3	2	3	3	3	3	3	3	3	3	2	2	2	2	3	3	3	3	3	3	3	3	3	3	3	3	3	3	3
Glomeruli Segmental Sclerosis3__CORR
Glomeruli Segmental Sclerosis3__p-Value	1	1	1	1	1	1	1	1	1	1	1	1	1	1	1	1	1	1	1	1	1	0	1	1	1	1	1	1	1	1	0	0	0	0	1	1	1	1	1	1	1	1	1	1	1	1	1	1	1
Glomeruli Segmental Sclerosis3__number	3	3	3	3	3	3	3	3	3	3	3	3	3	3	3	3	3	3	3	3	3	2	3	3	3	3	3	3	3	3	2	2	2	2	3	3	3	3	3	3	3	3	3	3	3	3	3	3	3
Glomeruli total number4__CORR	0.866025404	0.866025404	0.866025404	1	0.5	0.866025404	-0.866025404		-1	1	0.5	0.5	0.5	0.5		-0.5	-0.5	-0.866025404	-0.866025404	0	-0.5	-1	-0.866025404	-0.866025404	-0.5				0.866025404	0	1		-1	1			0	-0.866025404	-0.5	-0.866025404	0	0.866025404		-0.866025404	0.5	0		0	0
Glomeruli total number4__p-Value	0.333333333	0.333333333	0.333333333	0	0.666666667	0.333333333	0.333333333	1	0	0	0.666666667	0.666666667	0.666666667	0.666666667	1	0.666666667	0.666666667	0.333333333	0.333333333	1	0.666666667	0	0.333333333	0.333333333	0.666666667	1	1	1	0.333333333	1	0	0	0	0	1	1	1	0.333333333	0.666666667	0.333333333	1	0.333333333	1	0.333333333	0.666666667	1	1	1	1
Glomeruli total number4__number	3	3	3	3	3	3	3	3	3	3	3	3	3	3	3	3	3	3	3	3	3	2	3	3	3	3	3	3	3	3	2	2	2	2	3	3	3	3	3	3	3	3	3	3	3	3	3	3	3
Maximum intimal Elastosis in Arcuata or interlobular Artery (0=none, 1=minor if 2 elastica layers and/or up to 10% luminal stenosis, 2=moderate if 3 layers and/or 11-20% stenosis, 3=severe if 4 or more layers and/or > 21% stenosis)5__CORR	-1	-0.5	-0.5	-0.866025404	0	-0.5	0.5		0.866025404	-0.866025404	-0.866025404	-0.866025404	0	0		0.866025404	0.866025404	1	1	0.5	0.866025404	1	1	1	0				-0.5	0.5	-1		1	-1			-0.5	1	0.866025404	1	0.5	-0.5		1	0	0.5		0.5	0.5
Maximum intimal Elastosis in Arcuata or interlobular Artery (0=none, 1=minor if 2 elastica layers and/or up to 10% luminal stenosis, 2=moderate if 3 layers and/or 11-20% stenosis, 3=severe if 4 or more layers and/or > 21% stenosis)5__p-Value	0	0.666666667	0.666666667	0.333333333	1	0.666666667	0.666666667	1	0.333333333	0.333333333	0.333333333	0.333333333	1	1	1	0.333333333	0.333333333	0	0	0.666666667	0.333333333	0	0	0	1	1	1	1	0.666666667	0.666666667	0	0	0	0	1	1	0.666666667	0	0.333333333	0	0.666666667	0.666666667	1	0	1	0.666666667	1	0.666666667	0.666666667
Maximum intimal Elastosis in Arcuata or interlobular Artery (0=none, 1=minor if 2 elastica layers and/or up to 10% luminal stenosis, 2=moderate if 3 layers and/or 11-20% stenosis, 3=severe if 4 or more layers and/or > 21% stenosis)5__number	3	3	3	3	3	3	3	3	3	3	3	3	3	3	3	3	3	3	3	3	3	2	3	3	3	3	3	3	3	3	2	2	2	2	3	3	3	3	3	3	3	3	3	3	3	3	3	3	3
Only one Biopsy per Patient (sole or latest)__CORR
Only one Biopsy per Patient (sole or latest)__p-Value	1	1	1	1			1													1	1	1	1	1	1	1	1	1		1	1	1	1	1		1	1	1	1	1	1	1	1	1	1	1	1	1	1
Only one Biopsy per Patient (sole or latest)__number	86	86	86	86	91	91	86	91	91	91	91	91	91	91	91	91	91	91	91	68	45	43	73	90	90	87	59	89	91	89	42	42	42	39	91	20	20	19	20	18	4	4	16	20	20	20	14	20	20
adaequat (0=nein, 1=ja)53__CORR
adaequat (0=nein, 1=ja)53__p-Value	1	1	1	1			1													1	1	1	1	1	1	1	1	1		1	1	1	1	1		1	1	1	1	1	1	1	1	1	1	1	1	1	1
adaequat (0=nein, 1=ja)53__number	86	86	86	86	91	91	86	91	91	91	91	91	91	91	91	91	91	91	91	68	45	43	73	90	90	87	59	89	91	89	42	42	42	39	91	20	20	19	20	18	4	4	16	20	20	20	14	20	20
i54__CORR	0.089665342	0.109100994	0.126076569	0.139488289	-0.138645921	-0.241032492	0.066840495	-0.069523165	0.208429901	-0.163696774	-0.216060088	-0.235364345	-0.184310119	-0.240372447		0.747236723	0.356247829	0.018533829	0.062417603	0.499189169	0.649259342	0.201066449	0.152101811	0.066916991	-0.056678878	-0.0698888	0.007013055	0.178831844	0.186402447	-0.051664198	-0.111835461	-0.196827133	-0.210636663	0.034202197		0.894937334	0.327067394	0.184885096	-0.002838756	-0.107933533			0.447222667	-0.44923691	-0.534124633	-0.264644371	-0.235003882	-0.014682791	0.087749983
i54__p-Value	0.411640544	0.317337312	0.247395098	0.20022711	0.189974569	0.021359844	0.540890253	0.512574874	0.047407534	0.121031271	0.03969073	0.024713927	0.080305243	0.02172921		1.80E-17	0.000528552	0.861572852	0.556687724	1.47E-05	1.40E-06	0.196052744	0.198926007	0.530882552	0.595686541	0.520069705	0.957957916	0.093583017	0.076872967	0.630637148	0.480735157	0.211535416	0.180582327	0.8362413		1.01E-07	0.159257345	0.448598864	0.9905231	0.669891081	1	1	0.082410904	0.04691448	0.015271006	0.259501646	0.418661798	0.951010103	0.712968369
i54__number	86	86	86	86	91	91	86	91	91	91	91	91	91	91	91	91	91	91	91	68	45	43	73	90	90	87	59	89	91	89	42	42	42	39	91	20	20	19	20	18	4	4	16	20	20	20	14	20	20
t55__CORR	0.08407638	-0.056870427	-0.04155789	-0.018623826	-0.131173466	-0.185013925	0.10216443	-0.040370189	0.084796963	-0.150741482	-0.174137071	-0.151994079	-0.067714937	-0.050940938		0.233813325	0.672563534	-0.027434904	0.124929422	0.207733076	0.357546677	0.197217124	0.062124797	0.19322426	0.022493806	0.129043084	-0.116931466	0.002676648	0.153060442	-0.087645179	-0.225843111	-0.059368954	-0.281099933	-0.196426276		0.315012398	0.884795815	-0.107256948	-0.115678381	-0.168283103	0	0	0.464144228	-0.116174316	-0.01913442	-0.064942039	-0.127825779	0.078899194	0.073796644
t55__p-Value	0.441509231	0.602994928	0.704007203	0.864854642	0.215204712	0.079137311	0.349261714	0.703991187	0.424191829	0.1537911	0.098771849	0.150360736	0.523628421	0.631554902		0.025706343	2.86E-13	0.796296542	0.238037924	0.089159223	0.015895345	0.204932167	0.601574325	0.068046402	0.833325324	0.23357007	0.37778692	0.9801391	0.14748586	0.41408412	0.150401061	0.708796319	0.071338924	0.23072654		0.176116068	2.22E-07	0.662077164	0.627211944	0.504456602	1	1	0.070127073	0.625726134	0.936182625	0.785609793	0.663212178	0.740913257	0.757169364
t55__number	86	86	86	86	91	91	86	91	91	91	91	91	91	91	91	91	91	91	91	68	45	43	73	90	90	87	59	89	91	89	42	42	42	39	91	20	20	19	20	18	4	4	16	20	20	20	14	20	20
v56__CORR	0.097436533	-0.081806386	-0.085191631	-0.033595804	0.226313676	0.005620889	-0.001079608	0.143327684	0.23949768	0.003899476	-0.035053116	-0.027261943	-0.167587305	-0.128300618		0.151768886	0.110646585	0.750071012	0.051381668	0.297786377	0.151177893	0.30555563	0.13339275	-0.048875765	-0.088654435	-0.114205156	-0.093032497	0.189242513	-0.077713204	0.007742654	-0.066836259	-0.166227492	-0.138002049	0.094628023		0.166974354	-0.128973801	0.838525492	0.082754623	0.453742606	0	-0.577350269	-0.275208366	-0.105467093	-0.264376427	0.200230662	0.086479087	0.472291762	0.282535642
v56__p-Value	0.375007317	0.45669549	0.438215891	0.760184824	0.031960794	0.95806699	0.992175972	0.177758577	0.022995469	0.970902264	0.742915115	0.798675483	0.114373466	0.228149099	1	0.153301586	0.299174844	1.77E-17	0.630549617	0.013651132	0.3215358	0.046309803	0.260557836	0.649219476	0.40870798	0.295086853	0.483409891	0.077418873	0.466583828	0.942924163	0.674085569	0.292749929	0.383456214	0.566635729	1	0.494458929	0.598732451	7.32E-06	0.736261205	0.058578556	1	0.422649731	0.302244505	0.66740487	0.274058854	0.411130669	0.768790295	0.041169741	0.241194326
v56__number	85	85	85	85	90	90	85	90	90	90	90	90	90	90	90	90	90	90	90	68	45	43	73	89	89	86	59	88	90	88	42	42	42	39	90	19	19	19	19	18	4	4	16	19	19	19	14	19	19
g57__CORR	0.122096566	0.109630636	-0.089238462	0.058094015	-0.045953992	-0.007635679	0.140150553	0.002599665	0.044986777	-0.07840477	-0.050753944	-0.05764586	0.23042151	0.216632247		0.160734357	0.23348929	0.120046116	0.870083159	0.504962593	0.436719645	0.435314505	0.119631691	0.621150535	0.305465958	0.311543026	0.212476957	-0.107725225	0.150344227	0.195942859	0.110683019	0.229641592	-0.369080276	0.039758453		-0.01561132	-0.136060679	0.119422118	0.894792487	0.475270821	0	-0.23570226	0.28644595	0.196669565	0.281133124	0.004237077	-0.150970271	0.134680191	-0.214164189
g57__p-Value	0.262754537	0.314979501	0.413879481	0.595205808	0.665347707	0.94273414	0.198077935	0.980488528	0.671982639	0.460069279	0.63280901	0.587297617	0.027995163	0.039156994		0.128002433	0.0259179	0.257029194	4.37E-29	1.13E-05	0.002705508	0.003528836	0.313397856	6.50E-11	0.003414618	0.003310571	0.106169062	0.314974457	0.154891145	0.065728317	0.485296514	0.143476444	0.016157652	0.810091418		0.947915924	0.567340379	0.626287867	1.02E-07	0.046227936	1	0.76429774	0.282113435	0.40593821	0.229861755	0.985855322	0.606425463	0.571315232	0.364573543
g57__number	86	86	86	86	91	91	86	91	91	91	91	91	91	91	91	91	91	91	91	68	45	43	73	90	90	87	59	89	91	89	42	42	42	39	91	20	20	19	20	18	4	4	16	20	20	20	14	20	20
ptc58__CORR	-0.008411649	0.101340791	-0.122924819	-0.043511297	0.007591759	-0.160349852	0.100388481	-0.146309588	0.179952275	-0.225094993	-0.248104264	-0.272000147	-0.114698825	-0.201459809		0.525171067	0.342592006	0.294773429	0.524451812	0.862816938	0.685655078	0.303260751	0.342049123	0.334663205	0.211046802	-0.050541804	-0.070772706	0.167661008	-0.001225948	0.108198271	-0.02467773	-0.0205777	-0.322179221	-0.149052492		-0.085600809	-0.148398517	0.542326145	0.514495755	1	0	-0.577350269	-0.133630621	0.387083348	0.198029509	0	-0.235003882	0.334829399	-0.103417538
ptc58__p-Value	0.946556198	0.418139347	0.325459444	0.728668059	0.950264662	0.184831199	0.422549366	0.226820706	0.136046004	0.061000606	0.038366887	0.022734236	0.344411089	0.094449557	1	3.05E-06	0.003694568	0.013243478	3.16E-06	3.15E-21	2.81E-07	0.048059371	0.006972997	0.004943819	0.081731836	0.682309856	0.600875947	0.168505031	0.991963577	0.372621697	0.876721188	0.897082497	0.037452982	0.365136606	1	0.735573076	0.556753088	0.020060862	0.028919289	0	1	0.422649731	0.634937555	0.112524072	0.430872271	1	0.418661798	0.174410173	0.683007862
ptc58__number	66	66	66	66	70	70	66	70	70	70	70	70	70	70	70	70	70	70	70	68	44	43	61	69	69	68	57	69	70	70	42	42	42	39	70	18	18	18	18	18	4	4	15	18	18	18	14	18	18
humoral rejection score at least 2 of g_ptc_c4d values present and summarized__CORR	0.015912945	0.085750366	-0.116794073	-0.016717551	-0.087491418	-0.111657581	0.027359046	-0.173626098	-0.009612102	-0.034289189	-0.040177605	-0.057984805	-0.005381614	-0.054253216		0.274675642	0.232441391	0.215086693	0.632385516	0.626855449	0.46859941	0.37307904	0.599224702	0.548749578	0.279046942	0.159827817	0.112377339	-0.099793694	0.071382483	0.050120545	0.185986414	0.12787661	-0.405864345	0.008426687		0.311417321	0.199113525	-0.015277182	0.704896431	0.391210032	0	-0.23570226	0.801153515	0.106378655	0.168403467	-0.057780365	0.021937422	0.130923676	-0.277634983
humoral rejection score at least 2 of g_ptc_c4d values present and summarized__p-Value	0.890746041	0.458380439	0.311744717	0.885258399	0.434446087	0.317936508	0.81328361	0.118762696	0.931699338	0.759737925	0.720056672	0.604842383	0.961728366	0.628316033	1	0.01251277	0.035605211	0.052310488	1.86E-10	1.07E-08	0.001167988	0.013738009	2.13E-08	1.13E-07	0.011645307	0.162180718	0.396768449	0.378461096	0.523938452	0.65884093	0.238287531	0.419639771	0.007658105	0.959394592	1	0.194341863	0.413799779	0.950503852	0.000750851	0.108416162	1	0.76429774	0.00019132	0.66468958	0.490718305	0.814242884	0.940662318	0.593169381	0.249803002
humoral rejection score at least 2 of g_ptc_c4d values present and summarized__number	77	77	77	77	82	82	77	82	82	82	82	82	82	82	82	82	82	82	82	68	45	43	73	81	81	78	59	80	82	80	42	42	42	39	82	19	19	19	19	18	4	4	16	19	19	19	14	19	19
ti59__CORR	-0.023177695	0.048124116	-0.080781563	-0.012768666	0.02067546	-0.130202211	0.192422803	-0.12529838	0.086369686	-0.197957784	-0.202997684	-0.146960249	0.061829468	0.144250961		0.639585889	0.465336924	0.084862005	0.345131041	0.645981812	0.990347212	0.379821577	0.226066147	0.372312421	0.194096223	0.020694193	-0.056264745	0.187835638	0.455391502	0.252176458	-0.0946379	-0.063668586	-0.321885011	-0.07600523			0	0	0	0	1	0.707106781		0.433012702	0.307728727	0.516397779		0	0.707106781
ti59__p-Value	0.884162169	0.762161786	0.611062364	0.936033401	0.891518408	0.388439174	0.222140321	0.406705771	0.568179452	0.187249409	0.176041808	0.329755084	0.683128226	0.338846206	1	1.71E-06	0.001119541	0.574977895	0.018820881	1.65E-06	8.13E-37	0.014309285	0.149987817	0.010834696	0.196174247	0.891420704	0.723403673	0.211275708	0.00147236	0.094686468	0.561328691	0.696312444	0.042817334	0.650164619	1	1	1	1	1	1	0	0.292893219	1	0.391075888	0.552977398	0.294256368	1	1	0.116116524
ti59__number	42	42	42	42	46	46	42	46	46	46	46	46	46	46	46	46	46	46	46	45	43	41	42	46	46	46	42	46	46	45	40	40	40	38	46	6	6	6	6	6	4	4	5	6	6	6	4	6	6
i-IFTA510__CORR	-0.207944983	-0.080931658	-0.125682636	-0.154323751	0.106639383	0.110498684	-0.153950908	0.078686733	0.096770036	-0.052982686	-0.098339877	-0.069740591	-0.040135153	0.014048672		0.166166608	0.174439944	0.145548221	0.308373156	0.191447614	0.318108252	0.905627865	0.066256571	0.302333737	0.252279276	0.201058535	0.147254562	0.118462534	0.442259346	0.445115703	0.126011758	0.154173875	-0.289748611	0.143710429			-0.166666667	-0.612372436	-0.322748612	-0.612372436	0.707106781	1		-0.166666667	0.296174439	0.30429031		-0.166666667	0.645497224
i-IFTA510__p-Value	0.19789065	0.619582975	0.439668797	0.341710202	0.490841953	0.47519277	0.342891973	0.611655965	0.532043346	0.73267463	0.52537873	0.652827632	0.795892616	0.927881953	1	0.281029508	0.257423458	0.345836059	0.041694281	0.213163201	0.040069486	4.12E-16	0.680645973	0.046078576	0.098514089	0.190640058	0.352057721	0.443752103	0.002648423	0.00246532	0.43846228	0.342184954	0.06974765	0.389360298	1	1	0.788779982	0.272228401	0.596313859	0.272228401	0.292893219	0	1	0.788779982	0.628487081	0.618630389	1	0.788779982	0.239442599
i-IFTA510__number	40	40	40	40	44	44	40	44	44	44	44	44	44	44	44	44	44	44	44	44	42	41	41	44	44	44	42	44	44	44	40	40	40	38	44	5	5	5	5	5	4	4	4	5	5	5	4	5	5
C4d511__CORR	-0.05170694	-0.067895605	-0.058346058	-0.081835569	-0.043331019	-0.036664791	-0.021618634	-0.30282653	-0.160476919	0.041378556	0.013805024	0.010448204	-0.119473179	-0.122468118		0.086904901	0.098022763	0.097734828	0.110694576	0.269134596	0.132160691	0.099638022	0.838241004	0.248118958	0.141418736	0.102388962	0.027761336	-0.159622177	-0.031196225	-0.118217194	0.256743154	0.159655648	-0.207561988	0.103421407		0.447222667	0.464144228	-0.275208366	0.28644595	-0.133630621			1	0.018286548	0.009233611	0.024806947	0.36826252	-0.041406928	-0.222632615
C4d511__p-Value	0.666208117	0.570928184	0.626376592	0.494358902	0.708266816	0.751565096	0.856955716	0.007428505	0.163256977	0.720860101	0.905146331	0.928139834	0.300697959	0.288655231	1	0.452329084	0.396369774	0.397765247	0.337859663	0.031516292	0.398215205	0.535382973	7.64E-20	0.030686158	0.22301026	0.388697915	0.837580342	0.171331089	0.787672805	0.312426815	0.109768784	0.325084625	0.198736441	0.542436302	1	0.082410904	0.070127073	0.302244505	0.282113435	0.634937555	1	1	0	0.946408402	0.972925971	0.927340176	0.215681719	0.878984657	0.407234479
C4d511__number	72	72	72	72	77	77	72	77	77	77	77	77	77	77	77	77	77	77	77	64	43	41	71	76	76	73	57	75	77	75	40	40	40	37	77	16	16	16	16	15	4	4	16	16	16	16	13	16	16
cg512__CORR	0.033612514	0.056577923	-0.171340755	-0.017258656	-0.023443216	0.089508521	0.118111453	0.063722097	-0.047490463	-0.06188791	0.01810906	0.075289335	0.363942316	0.504712516		0.127907106	0.198182907	0.105594664	0.5963595	0.30007444	0.434374873	0.428054242	0.282493405	0.835137221	0.400801914	0.434377732	0.267034114	-0.019905578	0.371250662	0.281040298	0.218800419	0.258555272	-0.263976661	0.1366009		-0.427044461	-0.117823292	-0.043075152	0.225558417	0.352729518	0.707106781	0	0.018286548	0.85714765	0.631683222	0.360349884	0.315941574	-0.137132217	0.219283826
cg512__p-Value	0.758664357	0.604863596	0.114706558	0.87467752	0.825425054	0.398809878	0.278768885	0.548454727	0.654860708	0.560047569	0.864714991	0.478142288	0.000390791	3.37E-07		0.226947719	0.059682192	0.31916639	4.45E-10	0.012912083	0.002869007	0.004190286	0.0154562	1.44E-24	9.05E-05	2.63E-05	0.040901079	0.853109437	0.000291285	0.007633918	0.163882936	0.098267943	0.091172116	0.40698301		0.060391522	0.620795833	0.86100589	0.338983014	0.151087667	0.292893219	1	0.946408402	1.38E-06	0.002812358	0.118585334	0.271147695	0.564263463	0.352941945
cg512__number	86	86	86	86	91	91	86	91	91	91	91	91	91	91	91	91	91	91	91	68	45	43	73	90	90	87	59	89	91	89	42	42	42	39	91	20	20	19	20	18	4	4	16	20	20	20	14	20	20
mm513__CORR	0.149033294	-0.000864556	-0.15732006	0.010120721	-0.036841686	0.022122468	0.174280432	0.03682403	-0.12535364	0.101629298	0.145710519	0.196104247	0.128223465	0.261921079		0.022840624	0.057993721	0.067910004	0.321218397	0.269984235	0.337354639	0.405478106	0.120941298	0.390119805	0.807613742	0.170287126	-0.065970217	0.091746857	0.331612121	0.211609459	0.229377277	0.223930595	-0.097771511	0.111327978		-0.503006301	-0.012835915	-0.208434935	0.330638512	0.146998787	0.833333333	0.942809042	0.009233611	0.656765512	0.857609185	0.384819151	0.209965786	0.017752412	0.085393707
mm513__p-Value	0.170838142	0.993696582	0.148008265	0.926312973	0.728811703	0.835117286	0.108522797	0.728936629	0.236435382	0.337778176	0.168159378	0.062463988	0.225791107	0.012142493		0.829843991	0.585040487	0.522430234	0.001905479	0.025974307	0.023436061	0.006986192	0.308091354	0.000144093	6.84E-22	0.114818478	0.619593727	0.39249144	0.001322646	0.046513512	0.143950536	0.153978927	0.537902203	0.49985044		0.023780773	0.957166499	0.391815518	0.154485223	0.560521947	0.166666667	0.057190958	0.972925971	0.001656815	1.35E-06	0.093858081	0.471237695	0.940783872	0.720375244
mm513__number	86	86	86	86	91	91	86	91	91	91	91	91	91	91	91	91	91	91	91	68	45	43	73	90	90	87	59	89	91	89	42	42	42	39	91	20	20	19	20	18	4	4	16	20	20	20	14	20	20
ah514__CORR	0.07983395	0.044888514	-0.004009403	0.042281607	-0.048358673	0.157570233	-0.036339907	0.041747426	-0.153386138	-0.027903356	0.047341033	0.099137742	0.461208129	0.565140131		0.014419595	0.181521266	-0.074992336	0.30922446	0.106258152	0.083791569	0.179590191	0.05944289	0.417508638	0.150280099	0.754275526	0.516793658	-0.07630637	0.326822367	0.255462994	0.164831634	0.272527744	-0.136906608	0.019767936		-0.205873452	0.012279891	0.360584326	0.075127779	-0.024541571	1	0.707106781	0.024806947	0.479165539	0.475471062	0.966951921	0.781955395	0.467081676	0.598598888
ah514__p-Value	0.473103958	0.686981336	0.971303433	0.704293068	0.654571725	0.14259895	0.74430396	0.69935267	0.153644991	0.796357316	0.661390536	0.358114592	6.12E-06	9.69E-09	1	0.893924017	0.09053824	0.487424805	0.003373133	0.392097909	0.584215578	0.24917798	0.624974337	5.74E-05	0.164726503	3.33E-17	4.55E-05	0.48238659	0.001884565	0.017599686	0.296878956	0.080793294	0.387279616	0.904922226	1	0.383866743	0.959020427	0.129367082	0.752918751	0.922996431	0	0.292893219	0.927340176	0.03254658	0.034105442	3.96E-12	0.000952155	0.037861567	0.005295979
ah514__number	83	83	83	83	88	88	83	88	88	88	88	88	88	88	88	88	88	88	88	67	45	43	70	87	87	87	56	87	88	86	42	42	42	39	88	20	20	19	20	18	4	4	16	20	20	20	14	20	20
aah515__CORR	-0.070527559	0.122247298	0.120200891	0.087812301	-0.051630332	0.125208313	-0.103532022	-0.06341555	-0.178689406	0.013541433	0.101933745	0.139638409	0.451396877	0.562619382		-0.037343432	-0.063441861	-0.117329861	0.138603319	-0.010004737	0.042768655	0.152946235	-0.002322247	0.245730679	-0.030294584	0.511513235	0.944387963	0.049467683	0.375455572	0.106845036	0.345518409	0.199421797	0.100294395	0.201466013		-0.196946386	-0.069416855	0.120124995	-0.088535812	-0.196946386			0.383214231	0.402566919	0.305882075	0.767004756	1	0.181380716	0.359676862
aah515__p-Value	0.582820172	0.339849008	0.348055322	0.493750942	0.678188541	0.312702829	0.419391432	0.610174934	0.147957605	0.913392502	0.411758554	0.259737449	0.000126103	7.22E-07	1	0.764160797	0.610026439	0.344360732	0.263321153	0.937969749	0.785381154	0.333545597	0.985950244	0.046724301	0.809192924	1.83E-05	1.00E-28	0.693255871	0.001743326	0.389473237	0.026923892	0.211286942	0.53268433	0.225161332	1	0.464724241	0.798374736	0.657669142	0.744381301	0.464724241	1	1	0.176217703	0.122125283	0.249254752	0.000525991	0	0.501404972	0.171211666
aah515__number	63	63	63	63	67	67	63	67	67	67	67	67	67	67	67	67	67	67	67	63	43	42	60	66	66	63	58	66	67	67	41	41	41	38	67	16	16	16	16	16	4	4	14	16	16	16	14	16	16
cv516__CORR	0.072227223	-0.184548695	-0.067083191	-0.036889137	0.142118139	0.041517532	0.163263196	0.132802804	0.090731402	0.052464549	0.026303723	0.045803875	-0.004532172	0.061960578		0.238607434	0.064512086	0.205258983	0.015605436	0.392676352	0.309589828	0.140902325	-0.051697296	-0.023360503	0.044635106	-0.139925649	-0.131778784	0.759785838	0.182099259	0.077950896	0.105271545	0.065527804	-0.064215551	0.027070325		-0.005067596	0.07878386	0.519424194	0.126787629	0.266933074	0	0	-0.041406928	-0.154996786	-0.021947204	0.342302437	0.131870244	0.848140618	0.264306043
cv516__p-Value	0.513815558	0.092852103	0.544316435	0.739027111	0.183999479	0.699270568	0.13783887	0.214734443	0.397773672	0.625345017	0.806701751	0.669941619	0.966377366	0.564056816	1	0.024333176	0.548087531	0.053652121	0.884593227	0.001013327	0.038499319	0.367460903	0.668532008	0.82895885	0.679655389	0.198805925	0.324104174	6.03E-18	0.087646125	0.472970433	0.507012947	0.680122162	0.686196151	0.870058876	1	0.983083137	0.741279562	0.022655558	0.594269155	0.284268424	1	1	0.878984657	0.514081515	0.926823925	0.139592154	0.653156127	2.32E-06	0.260133979
cv516__number	84	84	84	84	89	89	84	89	89	89	89	89	89	89	89	89	89	89	89	67	45	43	71	88	88	86	58	89	89	87	42	42	42	39	89	20	20	19	20	18	4	4	16	20	20	20	14	20	20
ci517__CORR	0.059640547	0.058364257	0.080411219	0.095118019	0.063243239	0.123098996	0.053242699	0.140675561	0.028104911	-0.161278765	-0.090964849	-0.029564387	0.402687669	0.590401437		0.248517103	0.113590202	-0.030530606	0.024703938	0.102191562	0.460161462	0.377582079	-0.044203669	0.29228104	0.195099565	0.280369434	0.415998843	0.175003707	0.849438804	0.419872872	0.237731527	0.244074661	-0.034716487	-0.066707659		0.058284365	0.036166733	0.263632063	-0.271825957	-0.148867131	1	0.707106781	-0.266405476	0.122329067	-0.035801685	0.380538865	0.329235651	0.191366104	0.858611766
ci517__p-Value	0.585425959	0.593491596	0.461740394	0.383667867	0.551470045	0.245038998	0.626348369	0.183507456	0.791433366	0.126698827	0.391150136	0.780867744	7.58E-05	7.30E-10		0.017533585	0.283685663	0.773894658	0.81619763	0.406966419	0.001470333	0.012553898	0.710384835	0.005183875	0.065364729	0.008531801	0.001049638	0.100937048	1.93E-26	4.20E-05	0.129517048	0.119301484	0.827223111	0.686591296		0.807169532	0.879678432	0.275462461	0.246308758	0.555493814	0	0.292893219	0.318590431	0.60740359	0.880884568	0.097884215	0.250372968	0.418963668	1.27E-06
ci517__number	86	86	86	86	91	91	86	91	91	91	91	91	91	91	91	91	91	91	91	68	45	43	73	90	90	87	59	89	91	89	42	42	42	39	91	20	20	19	20	18	4	4	16	20	20	20	14	20	20
ct518__CORR	-0.126507254	-0.011561759	-0.051347949	-0.078236461	0.066446588	0.037351723	0.102939795	0.177000073	0.04855137	-0.190270942	-0.13417624	-0.079442291	0.365171692	0.526386337		0.125919428	0.076350594	0.024533896	0.060486478	0.087791955	0.308116846	0.427080171	-0.063596206	0.212653066	0.162367799	0.273903437	0.156010646	0.098310105	0.445087913	0.767150592	0.051923241	0.255344115	-0.100212452	0.200116772		0.170326153	0.12218491	0.263632063	-0.271825957	-0.122291188	1	0.707106781	-0.092530146	0.028677876	-0.101438107	0.380538865	0.266225399	0.191366104	0.797556827
ct518__p-Value	0.251506045	0.916867025	0.642743507	0.479324021	0.536128123	0.728204166	0.351439575	0.097047427	0.651395547	0.074100684	0.209987727	0.459279927	0.000433729	1.17E-07	1	0.239668709	0.476993359	0.819479328	0.573382091	0.476523359	0.041873166	0.004286789	0.598267686	0.04668428	0.130682679	0.011193989	0.23802323	0.364983596	1.24E-05	1.85E-18	0.743995917	0.102666552	0.527750215	0.22190815	1	0.472789762	0.607830229	0.275462461	0.246308758	0.628804027	0	0.292893219	0.73323191	0.904469364	0.670446233	0.097884215	0.357567098	0.418963668	2.53E-05
ct518__number	84	84	84	84	89	89	84	89	89	89	89	89	89	89	89	89	89	89	89	68	44	43	71	88	88	85	59	87	89	89	42	42	42	39	89	20	20	19	20	18	4	4	16	20	20	20	14	20	20
Glomeruli Global Sclerosis22319__CORR	0.179085173	0.082603623	0.065581359	0.109382684	0.034422372	0.146418114	-0.194767162	-0.045709147	-0.259729471	0.168267139	0.180130041	0.200391277	0.120226744	0.25887686		-0.103487239	-0.225654028	-0.070153698	0.067085601	0.037509827	-0.078163945	0.054751351	0.20837699	0.122753786	0.069484685	0.125651193	0.243018695	0.176251805	0.301133204	0.007856788	0.99612239	0.40362319	0.016486328	0.361644049			-0.544331054	-0.544331054	-0.388888889	-0.544331054	0.5	1		-0.544331054	-0.316227766	-0.23570226		-0.23570226	0.544331054
Glomeruli Global Sclerosis22319__p-Value	0.282014866	0.621986457	0.695658616	0.513291116	0.828664915	0.35483	0.241284864	0.773775753	0.096696199	0.28678355	0.253656261	0.203215233	0.448210574	0.097835537	1	0.514279508	0.150752051	0.658871388	0.672937498	0.813558218	0.627137445	0.73721074	0.196939658	0.438656998	0.661928893	0.427843161	0.125766578	0.264191339	0.052633145	0.960614962	9.93E-42	0.00980287	0.919575	0.025683242	1	1	0.455668946	0.455668946	0.611111111	0.455668946	0.666666667	0	1	0.455668946	0.683772234	0.76429774	1	0.76429774	0.455668946
Glomeruli Global Sclerosis22319__number	38	38	38	38	42	42	38	42	42	42	42	42	42	42	42	42	42	42	42	42	41	40	40	42	42	42	41	42	42	42	40	40	40	38	42	4	4	4	4	4	3	3	3	4	4	4	3	4	4
Glomeruli Segmental Sclerosis33420__CORR	0.076478532	-0.185679245	-0.184075159	-0.115742837	0.089816799	0.259251912	-0.010050378	0.121716124	-0.03286711	-0.109637599	-0.103994027	-0.106826379	0.291951915	0.258254689		-0.225876976	-0.102037164	-0.166227492	0.254637768	-0.043304977	-0.061416951	0.133739109	0.12113288	0.31164296	0.257424413	0.326507104	0.256824485	0.151812839	0.299068865	0.299198024	0.414528841	1	-0.027404556	0.158041195
Glomeruli Segmental Sclerosis33420__p-Value	0.648126768	0.264375949	0.26859818	0.488947485	0.571626061	0.097333094	0.952246014	0.442566224	0.83629821	0.489453687	0.51221034	0.500723497	0.060645941	0.09867343	1	0.150338263	0.520223043	0.292749929	0.103654003	0.785386387	0.7028626	0.410664822	0.456533836	0.044529811	0.099800154	0.034826433	0.105030066	0.337182904	0.054356131	0.054247019	0.007827912	0	0.866695783	0.343302126	1	1	1	1	1	1	1	1	1	1	1	1	1	1	1
Glomeruli Segmental Sclerosis33420__number	38	38	38	38	42	42	38	42	42	42	42	42	42	42	42	42	42	42	42	42	41	40	40	42	42	42	41	42	42	42	40	40	40	38	42	4	4	4	4	4	3	3	3	4	4	4	3	4	4
Glomeruli total number44521__CORR	0.221066686	0.253278744	0.193209327	0.292070793	0.113108514	0.263103383	-0.070936604	0.452530816	-0.206148409	0.145417052	0.127066485	0.137598493	-0.12748119	-0.03204182		-0.247956926	-0.320505779	-0.232359664	-0.419073826	-0.329441321	-0.330455421	-0.313878985	-0.287088015	-0.38056516	-0.115505932	-0.134395192	0.070846575	-0.061573963	0.025506041	-0.135836806	0.09722959	-0.027385139	0.935264611	-0.032564007			-0.25819889	-0.774596669	-0.632455532	-0.774596669	0	0.866025404		-0.774596669	-0.4	-0.447213595		-0.447213595	0.25819889
Glomeruli total number44521__p-Value	0.182270997	0.124956097	0.245143216	0.075186294	0.475722667	0.092287526	0.672142796	0.002621198	0.190264725	0.35816524	0.422615727	0.384862146	0.421090843	0.840354846	1	0.113356019	0.038511086	0.138667792	0.005738344	0.03313324	0.034841484	0.048568709	0.072470565	0.012909431	0.466358467	0.396129139	0.659818116	0.698482162	0.872616765	0.391035028	0.550606659	0.866789386	9.92E-19	0.846110368	1	1	0.74180111	0.225403331	0.367544468	0.225403331	1	0.333333333	1	0.225403331	0.6	0.552786405	1	0.552786405	0.74180111
Glomeruli total number44521__number	38	38	38	38	42	42	38	42	42	42	42	42	42	42	42	42	42	42	42	42	41	40	40	42	42	42	41	42	42	42	40	40	40	38	42	4	4	4	4	4	3	3	3	4	4	4	3	4	4
Maximum intimal Elastosis in Arcuata or interlobular Artery (0=none, 1=minor if 2 elastica layers and/or up to 10% luminal stenosis, 2=moderate if 3 layers and/or 11-20% stenosis, 3=severe if 4 or more layers and/or > 21% stenosis)55622__CORR	0.052602538	-0.094570218	-0.172521165	-0.067643725	-0.056419456	-0.146738378	0.03710014	0	-0.031947342	0.161356299	0.167938758	0.172939632	0.187999018	0.271316676		0.029442954	-0.218408834	0.217708848	0.181349035	-0.052935052	0.041209966	0.153677507	0.130676651	0.250689256	0.192645869	0.049315404	0.172934126	0.176035955	0.026507367	0.240157973	0.356604439	0.131177027	-0.047752236	0.914107131			-0.577350269	0.577350269	0.23570226	0.577350269	0.5	-0.5		0.577350269	-0.447213595	0		0	0.577350269
Maximum intimal Elastosis in Arcuata or interlobular Artery (0=none, 1=minor if 2 elastica layers and/or up to 10% luminal stenosis, 2=moderate if 3 layers and/or 11-20% stenosis, 3=severe if 4 or more layers and/or > 21% stenosis)55622__p-Value	0.757168822	0.57769516	0.307221865	0.69078165	0.729501602	0.366244248	0.827428609	1	0.844848535	0.319889931	0.300278085	0.28590438	0.245356995	0.090365073	1	0.856879588	0.175752825	0.177175897	0.262756788	0.745633696	0.803292183	0.356959388	0.434215941	0.118699839	0.23366957	0.762505987	0.292435581	0.277232412	0.871022677	0.135523187	0.027974641	0.432442908	0.77587884	1.11E-15	1	1	0.422649731	0.422649731	0.76429774	0.422649731	0.666666667	0.666666667	1	0.422649731	0.552786405	1	1	1	0.422649731
Maximum intimal Elastosis in Arcuata or interlobular Artery (0=none, 1=minor if 2 elastica layers and/or up to 10% luminal stenosis, 2=moderate if 3 layers and/or 11-20% stenosis, 3=severe if 4 or more layers and/or > 21% stenosis)55622__number	37	37	37	37	40	40	37	40	40	40	40	40	40	40	40	40	40	40	40	40	39	38	38	40	40	40	39	40	40	40	38	38	38	38	40	4	4	4	4	4	3	3	3	4	4	4	3	4	4
Banff Items normalized to Tx Age measured in Days (Item over Number of Days) __CORR
Banff Items normalized to Tx Age measured in Days (Item over Number of Days) __p-Value	1	1	1	1			1													1	1	1	1	1	1	1	1	1		1	1	1	1	1		1	1	1	1	1	1	1	1	1	1	1	1	1	1
Banff Items normalized to Tx Age measured in Days (Item over Number of Days) __number	86	86	86	86	91	91	86	91	91	91	91	91	91	91	91	91	91	91	91	68	45	43	73	90	90	87	59	89	91	89	42	42	42	39	91	20	20	19	20	18	4	4	16	20	20	20	14	20	20
i54.1__CORR	0.072798833	0.126142767	0.140130536	0.142384076	-0.152511957	-0.252887077	0.030013142	-0.092362139	0.137073015	-0.10881494	-0.177013238	-0.19967207	-0.287697321	-0.345063259		0.749250983	0.304128467	0.05894392	0.025747737	0.487186882	0.627072801	0.18268406	0.176126513	-0.019752973	-0.093923116	-0.142089029	-0.034012131	0.165737639	0.109775934	-0.068193296	-0.105164656	-0.196589275	-0.170015345	0.040709753		0.895438986	0.274901766	0.147780514	-0.053796092	-0.107933533			0.512739364	-0.448068542	-0.53273549	-0.316747306	-0.235003882	-0.073223021	0.0608383
i54.1__p-Value	0.505337999	0.247144965	0.198142648	0.190951984	0.148959352	0.015585042	0.783839176	0.383884103	0.195098716	0.304546987	0.093241964	0.057752077	0.005688116	0.000808992		1.32E-17	0.003380292	0.578895304	0.808576754	2.52E-05	4.04E-06	0.240980843	0.136084528	0.853392423	0.378574292	0.189243209	0.798154448	0.12060995	0.300270323	0.525441758	0.507446783	0.21209898	0.281733006	0.805633716		9.65E-08	0.240792261	0.546003794	0.821780963	0.669891081	1	1	0.042263164	0.047560498	0.015589385	0.173617947	0.418661798	0.75900315	0.798882325
i54.1__number	86	86	86	86	91	91	86	91	91	91	91	91	91	91	91	91	91	91	91	68	45	43	73	90	90	87	59	89	91	89	42	42	42	39	91	20	20	19	20	18	4	4	16	20	20	20	14	20	20
t55.1__CORR	0.110436553	-0.064638274	-0.033351025	-0.00678802	-0.123165756	-0.191774989	0.068193809	-0.003167759	0.087273705	-0.125715983	-0.158285811	-0.156375078	-0.155708014	-0.176948227		0.243655874	0.712972604	0.022369441	0.094590438	0.189334086	0.275770629	0.185000474	0.047042655	0.076055829	-0.012674236	0.021328464	-0.159870345	0.004922715	0.059156529	-0.117336355	-0.226354479	-0.032749062	-0.213033665	-0.234806146		0.390254184	0.827929937	-0.091340524	-0.149144053	-0.16704662	-0.333333333	-0.23570226	0.509859231	-0.245023278	-0.129371119	-0.182873259	-0.173956406	0.013074782	-0.119115705
t55.1__p-Value	0.311413539	0.55433413	0.760485177	0.950539687	0.244781183	0.06859627	0.532708839	0.976225897	0.410735285	0.235072532	0.133992633	0.138813339	0.140526882	0.093364202		0.01994444	2.23E-15	0.83330297	0.37246615	0.122016174	0.066712802	0.234964586	0.69268476	0.476170072	0.905622093	0.844544765	0.226466635	0.963481971	0.577524403	0.273477893	0.149454828	0.836878209	0.175557989	0.150190094		0.088922241	6.60E-06	0.70997218	0.530285057	0.50763876	0.666666667	0.76429774	0.043634155	0.297782552	0.586713265	0.440282284	0.552000546	0.956370119	0.616942469
t55.1__number	86	86	86	86	91	91	86	91	91	91	91	91	91	91	91	91	91	91	91	68	45	43	73	90	90	87	59	89	91	89	42	42	42	39	91	20	20	19	20	18	4	4	16	20	20	20	14	20	20
v56.1__CORR	0.090435313	-0.088898977	-0.090398197	-0.043180467	0.225423731	0.002994452	-0.0075477	0.144749185	0.241228693	0.006096065	-0.034702607	-0.028418545	-0.178794067	-0.142575097		0.151968562	0.111753135	0.766017119	0.050223074	0.291454749	0.138334916	0.303430297	0.133898245	-0.049610333	-0.087866071	-0.117700803	-0.101872914	0.187336751	-0.082459347	0.005424488	-0.068242557	-0.16602736	-0.144052553	0.099548889		0.14520058	-0.13907266	0.81279283	0.136442345	0.545587179	0	-0.577350269	-0.273460994	-0.05502839	-0.224646351	0.159319985	0.055428976	0.459988498	0.238545039
v56.1__p-Value	0.410442163	0.418471243	0.410635067	0.694767961	0.032659726	0.97765352	0.945342247	0.173451552	0.021995634	0.954525712	0.745397765	0.79032619	0.091777549	0.180070284	1	0.152755183	0.294338028	1.42E-18	0.638287422	0.015889444	0.364812516	0.04792831	0.258739298	0.644302796	0.412903962	0.280455378	0.442630486	0.080506251	0.439723533	0.959995697	0.667620015	0.293339641	0.362741776	0.546537504	1	0.553111508	0.570156953	2.34E-05	0.577542478	0.019181682	1	0.422649731	0.305449002	0.822953419	0.35515921	0.51472682	0.850717541	0.047522456	0.325362018
v56.1__number	85	85	85	85	90	90	85	90	90	90	90	90	90	90	90	90	90	90	90	68	45	43	73	89	89	86	59	88	90	88	42	42	42	39	90	19	19	19	19	18	4	4	16	19	19	19	14	19	19
g57.1__CORR	0.139187246	0.119025196	-0.078375061	0.073169465	-0.038531494	-0.008919011	0.103593883	0.020122925	0.04956429	-0.075672225	-0.057694615	-0.065199072	0.191542542	0.180048864		0.163606898	0.234868635	0.115280396	0.875101809	0.525807988	0.449391475	0.449489903	0.095878351	0.587831705	0.274918702	0.27760284	0.168850061	-0.10081149	0.120119962	0.181461157	0.066143761	0.191646537	-0.387418301	0.005607487		-0.045267058	-0.161275702	0.135983397	0.829592373	0.502884243	0	-0.23570226	0.209186396	0.140021419	0.249320209	-0.04117715	-0.220971651	0.170853717	-0.213467718
g57.1__p-Value	0.20120956	0.275040595	0.473195628	0.503167152	0.716888369	0.933130027	0.342524345	0.849837332	0.640811836	0.475900745	0.586981026	0.539205107	0.068938816	0.087673437		0.121238381	0.025027497	0.276535403	8.49E-30	4.13E-06	0.001956137	0.0024959	0.41971985	1.12E-09	0.008731619	0.009234845	0.201103546	0.347214166	0.256734519	0.088781469	0.677277944	0.224046737	0.011249751	0.972973148		0.849699499	0.496964167	0.578835314	6.09E-06	0.033406161	1	0.76429774	0.436844531	0.556003942	0.289119264	0.863150657	0.447748201	0.471399121	0.366172611
g57.1__number	86	86	86	86	91	91	86	91	91	91	91	91	91	91	91	91	91	91	91	68	45	43	73	90	90	87	59	89	91	89	42	42	42	39	91	20	20	19	20	18	4	4	16	20	20	20	14	20	20
ptc58.1__CORR	-0.01028948	0.112573129	-0.109187368	-0.033435287	0.00869358	-0.169851206	0.081020768	-0.136104449	0.174592258	-0.222218923	-0.248566037	-0.272818067	-0.134655802	-0.219452883		0.520509298	0.342687732	0.30349581	0.506391907	0.859117116	0.675050905	0.303500675	0.333796823	0.307393438	0.193448827	-0.071597992	-0.084861594	0.168433753	-0.020538343	0.101881626	-0.024558225	-0.053242929	-0.314920183	-0.147439444		-0.085600809	-0.148398517	0.542326145	0.514495755	1	0	-0.577350269	-0.133630621	0.387083348	0.198029509	0	-0.235003882	0.334829399	-0.103417538
ptc58.1__p-Value	0.934649014	0.368152365	0.382822674	0.789843279	0.943057622	0.159805188	0.51782352	0.261239963	0.148297604	0.064467674	0.037996414	0.022313243	0.266397656	0.067950435	1	3.86E-06	0.003684387	0.010647567	7.73E-06	7.14E-21	5.01E-07	0.047873991	0.008564338	0.010190789	0.11124218	0.56177203	0.530246041	0.166523218	0.865985547	0.401333759	0.877313623	0.737717086	0.042221043	0.37040725	1	0.735573076	0.556753088	0.020060862	0.028919289	0	1	0.422649731	0.634937555	0.112524072	0.430872271	1	0.418661798	0.174410173	0.683007862
ptc58.1__number	66	66	66	66	70	70	66	70	70	70	70	70	70	70	70	70	70	70	70	68	44	43	61	69	69	68	57	69	70	70	42	42	42	39	70	18	18	18	18	18	4	4	15	18	18	18	14	18	18
ti59.1__CORR	-0.025380559	0.128998764	0.038612033	0.071541795	0.046600968	-0.195940725	0.129778542	-0.119627397	0.089688566	-0.19057427	-0.220422117	-0.197303675	-0.098193904	-0.077744511		0.680515261	0.47661543	0.149239954	0.245438822	0.633823626	0.942544919	0.36085813	0.201259685	0.187588532	0.089964864	-0.150396271	-0.116200139	0.214100255	0.312842817	0.228836136	-0.135377194	-0.111604671	-0.240364391	-0.063045223			-0.525105032	0.398526698	0.445896321	0.398526698	0.316227766	0		0.210042013	0.044781108	0.187867287		0.420084025	0.257247878
ti59.1__p-Value	0.873238343	0.415537233	0.808181019	0.652545047	0.758438446	0.19187442	0.412699876	0.428434527	0.553346213	0.204572861	0.141019189	0.188740455	0.516191626	0.607562401	1	1.96E-07	0.000812328	0.32222479	0.100157289	2.96E-06	3.94E-21	0.020456318	0.201223234	0.211887954	0.55211965	0.318447009	0.463665431	0.153072014	0.034271214	0.130527298	0.40490413	0.492956485	0.135177314	0.706895449	1	1	0.284737448	0.433857661	0.375482858	0.433857661	0.683772234	1	1	0.689570261	0.93287324	0.721514374	1	0.4069402	0.622640062
ti59.1__number	42	42	42	42	46	46	42	46	46	46	46	46	46	46	46	46	46	46	46	45	43	41	42	46	46	46	42	46	46	45	40	40	40	38	46	6	6	6	6	6	4	4	5	6	6	6	4	6	6
i-IFTA510.1__CORR	-0.298943863	-0.072966801	-0.035678104	-0.163613955	0.247208616	0.154117955	-0.268007918	0.065526821	0.139652291	0.036956892	-0.038048159	-0.04244311	-0.279956128	-0.276697015		0.109692688	0.155330204	0.260934908	0.156143659	0.154739991	0.207952168	0.823611992	0.057497607	0.092008354	0.174603022	0.086799661	0.0364486	0.142152169	0.214666207	0.358194423	0.030186884	0.050493339	-0.184955157	0.04315307			-0.444261658	-0.544107188	-0.286769667	-0.544107188	0.5	0.942809042		-0.444261658	-0.105263158	-0.108147614		-0.148087219	0.344123601
i-IFTA510.1__p-Value	0.060952747	0.65455289	0.826991013	0.313074847	0.105703374	0.317864268	0.094519085	0.672588993	0.365930692	0.811750579	0.806296956	0.78442736	0.065686805	0.069026818	1	0.478439055	0.314026258	0.087118562	0.311467382	0.315891202	0.186330267	3.78E-11	0.721036147	0.552507662	0.256971904	0.575310501	0.818743497	0.357326344	0.161718223	0.016967658	0.853302296	0.757002944	0.253222486	0.79698815	1	1	0.453549347	0.343110821	0.639941616	0.343110821	0.5	0.057190958	1	0.453549347	0.866222705	0.862571071	1	0.812140928	0.570656465
i-IFTA510.1__number	40	40	40	40	44	44	40	44	44	44	44	44	44	44	44	44	44	44	44	44	42	41	41	44	44	44	42	44	44	44	40	40	40	38	44	5	5	5	5	5	4	4	4	5	5	5	4	5	5
C4d511.1__CORR	-0.014439526	-0.067436833	-0.055055427	-0.064546293	-0.069167739	-0.074114891	-0.047628882	-0.316348948	-0.165781585	0.049839891	0.010811381	0.003954584	-0.195973665	-0.199868254		0.099165659	0.087231448	0.110759614	0.063500808	0.274913943	0.123817095	0.057221766	0.832699946	0.185152426	0.101829583	0.047044919	-0.018309442	-0.157302004	-0.073245894	-0.166937408	0.243476375	0.131215567	-0.218069873	0.079915322		0.490291598	0.499706294	-0.273807806	0.27481005	-0.132651629			0.994910908	-0.024614717	-0.035725745	-0.016453801	0.304145011	-0.041196204	-0.221499618
C4d511.1__p-Value	0.904177901	0.573538959	0.645994734	0.590114399	0.550017711	0.521782596	0.691148491	0.005064269	0.149605823	0.666862798	0.92564897	0.972770401	0.087610234	0.081371754	1	0.390859369	0.450625587	0.337574144	0.583240526	0.027912375	0.428915433	0.722321047	2.21E-19	0.109321888	0.381413178	0.692670703	0.892467955	0.177721968	0.526688853	0.152285569	0.130041915	0.419630231	0.176440908	0.638230155	1	0.053847263	0.048733767	0.3048114	0.302973221	0.637441504	1	1	2.34E-15	0.927901851	0.895496997	0.951773415	0.31234425	0.879596331	0.409687541
C4d511.1__number	72	72	72	72	77	77	72	77	77	77	77	77	77	77	77	77	77	77	77	64	43	41	71	76	76	73	57	75	77	75	40	40	40	37	77	16	16	16	16	15	4	4	16	16	16	16	13	16	16
cg512.1__CORR	0.049705296	0.030971258	-0.186749188	-0.025257021	-0.038657269	0.077093789	0.12035172	0.030063432	-0.016842303	-0.072778822	-0.006659351	0.040429902	0.329812616	0.447500784		0.163086144	0.245729684	0.129438693	0.646410018	0.353443051	0.440465145	0.459072536	0.283974469	0.844847541	0.392614465	0.41889719	0.216034895	0.005451647	0.338561189	0.281983927	0.187722706	0.23464317	-0.275252877	0.160094536		-0.424149211	-0.183168753	0	0.22402919	0.424513856	0.5	-0.23570226	-0.029957234	0.828478613	0.573268418	0.341198626	0.332071789	-0.117906638	0.208907459
cg512.1__p-Value	0.649480516	0.777114969	0.085127501	0.817444248	0.716003559	0.467628268	0.269687805	0.777263992	0.874097859	0.492979106	0.950046273	0.703573716	0.001410233	8.69E-06		0.122443772	0.018883237	0.221386706	4.50E-12	0.003110548	0.002461337	0.001958361	0.014901956	1.25E-25	0.000129458	5.39E-05	0.100308307	0.959561349	0.001028802	0.00742436	0.233855238	0.134721117	0.077687265	0.330275089		0.062345629	0.43953114	1	0.342354809	0.07910295	0.5	0.76429774	0.912304372	6.43E-06	0.008232373	0.140956552	0.246069684	0.620547046	0.376741176
cg512.1__number	86	86	86	86	91	91	86	91	91	91	91	91	91	91	91	91	91	91	91	68	45	43	73	90	90	87	59	89	91	89	42	42	42	39	91	20	20	19	20	18	4	4	16	20	20	20	14	20	20
mm513.1__CORR	0.162248111	-0.051602643	-0.126897491	-0.000323202	0.015623741	0.01259141	0.107689071	-0.008999515	-0.069551405	0.148961533	0.165123006	0.181465057	-0.058575654	-0.007803316		0.011466213	0.019902828	0.090487784	0.249549768	0.248865664	0.167127483	0.395365949	0.111378495	0.230601825	0.833542592	0.047249046	-0.163622762	0.133083134	0.218981587	0.137387112	0.200210374	0.192013057	0.040006922	0.178117842		-0.496521025	0.042884501	-0.082141093	0.343315487	0.361204094	-0.948683298	-0.894427191	-0.097300851	0.51649364	0.759856917	0.225724732	-0.018977006	0.050623529	-0.103875881
mm513.1__p-Value	0.135563324	0.637030107	0.244305463	0.997643535	0.883140212	0.905704275	0.323678155	0.932527859	0.512403199	0.158765805	0.117780965	0.085167438	0.581273439	0.941479094		0.914097098	0.851460866	0.393649596	0.017055119	0.040710111	0.272503049	0.008688698	0.348184454	0.028767166	2.13E-24	0.663868535	0.215610497	0.213759477	0.037027824	0.199183027	0.203631929	0.22314521	0.801388455	0.277984179		0.025954074	0.857530784	0.738150937	0.138348139	0.140831842	0.051316702	0.105572809	0.719980815	0.019722572	0.000101464	0.338617485	0.948659472	0.832143629	0.662969174
mm513.1__number	86	86	86	86	91	91	86	91	91	91	91	91	91	91	91	91	91	91	91	68	45	43	73	90	90	87	59	89	91	89	42	42	42	39	91	20	20	19	20	18	4	4	16	20	20	20	14	20	20
ah514.1__CORR	0.135564495	0.064903067	0.042703487	0.077972293	-0.057386458	0.120948767	-0.084768198	0.00830029	-0.071016272	0.00508176	0.025679042	0.048126558	0.289796241	0.325309304		0.029719727	0.199705782	-0.059605219	0.300387194	0.101938873	-0.054784497	0.208875713	0.037724381	0.323974373	0.143010227	0.73347436	0.250088826	-0.115474117	0.206221479	0.256092867	-0.07352928	0.15962812	-0.178154439	-0.093218005		-0.137336378	-0.042260441	0.567513025	0.134660073	0.357120363	0.316227766	0	-0.097300851	0.387897264	0.33335812	0.837469853	0.568139242	0.663878847	0.500913671
ah514.1__p-Value	0.221718528	0.559931772	0.701480985	0.483517677	0.595367888	0.26164829	0.446098295	0.938821144	0.510861281	0.962521346	0.812280096	0.656124569	0.006168416	0.001983987	1	0.783415982	0.062117147	0.58119329	0.004461052	0.411734907	0.720768026	0.178880248	0.756521293	0.002204982	0.186361071	6.52E-16	0.063035163	0.286848748	0.053899562	0.017313087	0.643528755	0.31259971	0.258987204	0.572456603	1	0.56367805	0.859584172	0.011265369	0.571373248	0.145711791	0.683772234	1	0.719980815	0.091038659	0.150918203	4.10E-06	0.034038384	0.001413621	0.024465673
ah514.1__number	83	83	83	83	88	88	83	88	88	88	88	88	88	88	88	88	88	88	88	67	45	43	70	87	87	87	56	87	88	86	42	42	42	39	88	20	20	19	20	18	4	4	16	20	20	20	14	20	20
aah515.1__CORR	-0.041409133	0.122327191	0.118784098	0.100280462	-0.102024471	0.106766568	-0.153348828	-0.057191013	-0.184349969	0.058084401	0.126124463	0.147375066	0.408234909	0.477684788		-0.059695168	-0.067154703	-0.144494584	0.181275666	-0.023799726	0.000336423	0.174087968	0.003497572	0.252681926	0.010190819	0.525838303	0.915196932	0.039344333	0.357421384	0.116690575	0.310513724	0.180221257	0.130773154	0.191605934		-0.193084317	-0.025660311	0.070661625	-0.166922398	-0.193084317			0.327124445	0.391035147	0.285771626	0.751963987	0.972672424	0.191160678	0.401520841
aah515.1__p-Value	0.747277432	0.339531104	0.353808153	0.434222378	0.411340301	0.389823557	0.23017534	0.645734813	0.135331292	0.640579641	0.309147095	0.23399654	0.000604967	4.36E-05	1	0.631327739	0.589231117	0.243365667	0.142083859	0.853113075	0.998291681	0.270193658	0.978840799	0.040665782	0.935274286	9.61E-06	9.13E-24	0.753787489	0.002984607	0.347014272	0.048164291	0.259508098	0.415089644	0.249157464	1	0.473699353	0.924847131	0.794830441	0.536649204	0.473699353	1	1	0.253605726	0.134224353	0.283298064	0.000780183	5.67E-09	0.478201056	0.123190419
aah515.1__number	63	63	63	63	67	67	63	67	67	67	67	67	67	67	67	67	67	67	67	63	43	42	60	66	66	63	58	66	67	67	41	41	41	38	67	16	16	16	16	16	4	4	14	16	16	16	14	16	16
cv516.1__CORR	0.056156386	-0.194262789	-0.043256373	-0.037861208	0.169962164	0.038065667	0.121021988	0.086562394	0.056079008	0.079062766	0.045619259	0.053321645	-0.069977364	-0.037227918		0.256042619	0.049505468	0.267050621	-0.000207203	0.394758094	0.280503902	0.149692177	-0.045787295	-0.058146889	0.055158465	-0.193131888	-0.148784571	0.790966023	0.155744985	0.069419316	0.133147456	0.079845023	0.013887549	0.055435569		-0.03409988	-0.020725519	0.578489986	0.235091474	0.451965002	0	-0.23570226	-0.129852845	-0.109010356	0	0.290334864	0.037612196	0.828069496	0.192490979
cv516.1__p-Value	0.611894866	0.076613944	0.696023588	0.732405918	0.111303395	0.72321703	0.272815666	0.419897396	0.601683948	0.461434672	0.671195092	0.619698645	0.514638475	0.729070143	1	0.015440755	0.64500376	0.011410803	0.998462382	0.000947107	0.06198662	0.338019794	0.704567989	0.590492417	0.609755331	0.074808321	0.264995732	2.94E-20	0.144996569	0.522883785	0.400569116	0.615215584	0.930441314	0.737482288	1	0.886510697	0.930887652	0.009465709	0.318405561	0.059698852	1	0.76429774	0.631713876	0.647321582	1	0.21431954	0.898422268	6.56E-06	0.416182345
cv516.1__number	84	84	84	84	89	89	84	89	89	89	89	89	89	89	89	89	89	89	89	67	45	43	71	88	88	86	58	89	89	87	42	42	42	39	89	20	20	19	20	18	4	4	16	20	20	20	14	20	20
ci517.1__CORR	0.154150796	0.027138779	0.179288658	0.167869285	0.03519857	0.065048263	0.072549484	0.052017689	-0.001357325	-0.048533647	-0.03731996	-0.016430138	0.224610635	0.300419093		0.292862777	0.200064987	0.00218193	0.072198419	0.136656263	0.422899636	0.410165496	-0.039349657	0.191799826	0.199095756	0.150916763	0.211632766	0.214316652	0.831252729	0.341400859	0.118549417	0.233782888	0.021796385	-0.114731332		0.148759591	-0.192725401	0.369581352	-0.038836782	0.304020219	0.632455532	0	-0.401200595	0.024754608	-0.128283947	0.172178551	-0.015030373	0.331070126	0.625463761
ci517.1__p-Value	0.156452833	0.804105319	0.098587951	0.122355605	0.740467785	0.540146022	0.506801192	0.62435383	0.989812034	0.647778383	0.725430298	0.877154585	0.032317658	0.003811558		0.004845024	0.057251409	0.983623312	0.496443393	0.266470766	0.003801051	0.006300331	0.741000384	0.070142188	0.059935666	0.162924268	0.107597682	0.043718908	2.03E-24	0.001059611	0.454613998	0.13619805	0.891022929	0.486749971		0.531357683	0.415603979	0.119390625	0.870864393	0.219995101	0.367544468	1	0.123517782	0.917492344	0.58988794	0.467916009	0.959327625	0.153915253	0.003184658
ci517.1__number	86	86	86	86	91	91	86	91	91	91	91	91	91	91	91	91	91	91	91	68	45	43	73	90	90	87	59	89	91	89	42	42	42	39	91	20	20	19	20	18	4	4	16	20	20	20	14	20	20
ct518.1__CORR	-0.057189513	-0.008517839	0.098193126	0.005687925	0.076236129	-0.072980229	0.04991868	0.000927112	0.051236745	-0.045825404	-0.112993514	-0.127893988	-0.10995771	-0.153535163		0.135682727	0.150190963	0.160700908	0.076201123	0.131357985	0.087329631	0.419328611	-0.033282073	-0.035042983	0.125989616	0.027776113	-0.307787655	0.098276096	0.123173274	0.646160574	-0.302917789	0.022506235	-0.007502866	0.057999755		0.431187221	-0.01675873	0.290385348	-0.101407153	0.304492423	0.632455532	0	0.058427271	-0.139137972	-0.282549452	0.035401197	-0.030160561	0.219473454	0.361126021
ct518.1__p-Value	0.605351656	0.938703963	0.374207282	0.959046643	0.477656148	0.496714505	0.652034039	0.993120154	0.633471254	0.669795508	0.291750052	0.232319504	0.304991058	0.150858882	1	0.204867542	0.160065521	0.132474874	0.47785894	0.285629617	0.572970917	0.005126401	0.78290274	0.745838411	0.242139428	0.80077818	0.017717888	0.365150318	0.250155132	8.01E-12	0.051179289	0.887496198	0.962387829	0.725799021	1	0.057676497	0.944093351	0.227805379	0.670541369	0.21924342	0.367544468	1	0.829819065	0.558523771	0.227423107	0.882208086	0.918478066	0.352515284	0.117735932
ct518.1__number	84	84	84	84	89	89	84	89	89	89	89	89	89	89	89	89	89	89	89	68	44	43	71	88	88	85	59	87	89	89	42	42	42	39	89	20	20	19	20	18	4	4	16	20	20	20	14	20	20
Glomeruli Global Sclerosis22319.1__CORR	0.105354746	0.075323685	0.093081922	0.060525209	0.059739005	0.098439305	-0.245305084	-0.093170303	-0.295068689	0.1417562	0.134935641	0.14836939	-0.083738012	0.004177747		-0.025724523	-0.19477325	0.009310428	0.009215641	0.099603763	-0.052886534	0.01816607	0.353301665	0.05905885	0.106760549	0.022038377	0.132119987	0.207225178	0.138201599	-0.120330922	0.937445555	0.289762412	0.097844325	0.306988011			-0.544331054	-0.544331054	-0.388888889	-0.544331054	0.5	1		-0.544331054	-0.316227766	-0.23570226		-0.23570226	0.544331054
Glomeruli Global Sclerosis22319.1__p-Value	0.529014507	0.65310349	0.578322349	0.718121768	0.707061718	0.535115473	0.137693345	0.557291513	0.057823548	0.370522823	0.394214901	0.348383367	0.59803081	0.979051637	1	0.871534693	0.216436159	0.953335431	0.953809997	0.530272958	0.742611919	0.911411641	0.025332872	0.710251042	0.500988976	0.88982041	0.410259412	0.187909001	0.382762129	0.447814493	5.27E-19	0.069733739	0.548077728	0.060828765	1	1	0.455668946	0.455668946	0.611111111	0.455668946	0.666666667	0	1	0.455668946	0.683772234	0.76429774	1	0.76429774	0.455668946
Glomeruli Global Sclerosis22319.1__number	38	38	38	38	42	42	38	42	42	42	42	42	42	42	42	42	42	42	42	42	41	40	40	42	42	42	41	42	42	42	40	40	40	38	42	4	4	4	4	4	3	3	3	4	4	4	3	4	4
Glomeruli Segmental Sclerosis33420.1__CORR	0.087269863	-0.191515075	-0.177656107	-0.112339204	0.112239775	0.276890757	-0.020036944	0.144825481	-0.036638779	-0.101149121	-0.100195282	-0.10321611	0.261136273	0.227569507		-0.225010548	-0.085763615	-0.165589869	0.225693265	-0.055184134	-0.073104177	0.124925334	0.09663061	0.279714018	0.245329119	0.307389437	0.215859109	0.165730732	0.283655237	0.294875626	0.407348921	0.995738185	0.004168964	0.140455835
Glomeruli Segmental Sclerosis33420.1__p-Value	0.602371988	0.24938625	0.285936003	0.501900351	0.479140229	0.075865957	0.904957031	0.360145062	0.817813688	0.523879674	0.527821294	0.515388218	0.09483865	0.147224079	1	0.151951022	0.589173016	0.294631428	0.150679167	0.728511804	0.649664916	0.442451908	0.553076068	0.072805351	0.117355206	0.047678042	0.175267453	0.294215101	0.068696301	0.057995269	0.009085005	5.96E-41	0.979631557	0.400299863	1	1	1	1	1	1	1	1	1	1	1	1	1	1	1
Glomeruli Segmental Sclerosis33420.1__number	38	38	38	38	42	42	38	42	42	42	42	42	42	42	42	42	42	42	42	42	41	40	40	42	42	42	41	42	42	42	40	40	40	38	42	4	4	4	4	4	3	3	3	4	4	4	3	4	4
Glomeruli total number44521.1__CORR	-0.057172987	0.095908182	0.15776553	0.055751139	0.147643937	-0.098096562	-0.264903754	0.204986168	0.113868188	0.056042596	0.007749429	0.002962425	-0.875308999	-0.938487725		-0.045159736	-0.052151639	0.18303348	-0.452859184	-0.150200696	-0.151975675	-0.031028554	-0.097370346	-0.497224668	-0.131986275	-0.375474928	-0.283869569	-0.08765933	-0.469506208	-0.483165461	-0.128862706	-0.275983473	0.349600126	-0.202806007			0.774596669	-0.774596669	-0.948683298	-0.774596669	-0.866025404	0		-0.774596669	-0.6	-0.894427191		-0.894427191	-0.774596669
Glomeruli total number44521.1__p-Value	0.733145887	0.566786139	0.344155304	0.739548443	0.35077171	0.536544876	0.107990938	0.192830839	0.472744728	0.724452832	0.961152727	0.985144773	3.40E-14	4.50E-20	1	0.776424879	0.742908056	0.245955877	0.002600097	0.342398685	0.342849346	0.849258496	0.550027124	0.000808245	0.404726817	0.014273085	0.072075072	0.580936377	0.00170787	0.001190513	0.428087835	0.084747494	0.027018542	0.222026739	1	1	0.225403331	0.225403331	0.051316702	0.225403331	0.333333333	1	1	0.225403331	0.4	0.105572809	1	0.105572809	0.225403331
Glomeruli total number44521.1__number	38	38	38	38	42	42	38	42	42	42	42	42	42	42	42	42	42	42	42	42	41	40	40	42	42	42	41	42	42	42	40	40	40	38	42	4	4	4	4	4	3	3	3	4	4	4	3	4	4
Maximum intimal Elastosis in Arcuata or interlobular Artery (0=none, 1=minor if 2 elastica layers and/or up to 10% luminal stenosis, 2=moderate if 3 layers and/or 11-20% stenosis, 3=severe if 4 or more layers and/or > 21% stenosis)55622.1__CORR	-0.120632633	-0.109962961	-0.076637694	-0.122085811	0.057977907	-0.20636652	-0.21548292	-0.103065464	0.203379872	0.241457217	0.242673724	0.232097497	-0.465649023	-0.518350325		0.028353538	-0.142898218	0.42495208	-0.193580545	-0.184548127	-0.119154206	0.182783909	0.011496241	-0.147194795	0.111405303	-0.074890372	-0.127422435	-0.040226264	-0.437776434	-0.097614372	-0.082059828	-0.247283522	-0.076436409	0.574774763			0.774596669	0.25819889	-0.210818511	0.25819889	-0.866025404	-0.866025404		0.25819889	-0.4	-0.447213595		-0.447213595	-0.774596669
Maximum intimal Elastosis in Arcuata or interlobular Artery (0=none, 1=minor if 2 elastica layers and/or up to 10% luminal stenosis, 2=moderate if 3 layers and/or 11-20% stenosis, 3=severe if 4 or more layers and/or > 21% stenosis)55622.1__p-Value	0.47696143	0.517055909	0.652110011	0.471629721	0.72232285	0.201392773	0.200245206	0.526823662	0.208137454	0.133357078	0.13135232	0.149547917	0.002462218	0.000611913	1	0.862123277	0.37905666	0.006270231	0.231365304	0.254286904	0.46999473	0.272029012	0.94538569	0.364738891	0.493734211	0.646036821	0.439509575	0.805337418	0.004727042	0.549023075	0.624289462	0.134447096	0.648308029	0.000160534	1	1	0.225403331	0.74180111	0.789181489	0.74180111	0.333333333	0.333333333	1	0.74180111	0.6	0.552786405	1	0.552786405	0.225403331
Maximum intimal Elastosis in Arcuata or interlobular Artery (0=none, 1=minor if 2 elastica layers and/or up to 10% luminal stenosis, 2=moderate if 3 layers and/or 11-20% stenosis, 3=severe if 4 or more layers and/or > 21% stenosis)55622.1__number	37	37	37	37	40	40	37	40	40	40	40	40	40	40	40	40	40	40	40	40	39	38	38	40	40	40	39	40	40	40	38	38	38	38	40	4	4	4	4	4	3	3	3	4	4	4	3	4	4
sum i + t__CORR	0.063830365	0.028940197	0.032862821	0.039490798	-0.160221414	-0.260137477	0.116995982	-0.068528764	0.143912256	-0.168112089	-0.206245523	-0.197711986	-0.167927039	-0.180862644		0.517720521	0.571499324	-0.021358143	0.087974219	0.337611242	0.461618785	0.214192316	0.09787385	0.136424983	-0.024504901	0.023823501	-0.067571061	0.095716004	0.208757202	-0.069863086	-0.205387575	-0.09041483	-0.232800519	-0.129506455		0.635988815	0.809222662	0.045831547	-0.104860584	-0.1674147	0	0	0.468628713	-0.263869066	-0.220241701	-0.115489388	-0.174257109	0.100905378	0.178800407
sum i + t__p-Value	0.559306102	0.791388098	0.763888168	0.718096068	0.129240051	0.012764178	0.283365833	0.518638732	0.173528361	0.111187816	0.049832205	0.060303389	0.111587488	0.086226379		1.48E-07	3.29E-09	0.840737611	0.406974991	0.004868976	0.001413608	0.167823029	0.410063584	0.19978881	0.818667864	0.826628313	0.61110281	0.372248854	0.047052772	0.51532706	0.191941821	0.569057464	0.137899249	0.432001393		0.002576458	1.55E-05	0.852201933	0.659957557	0.506690494	1	1	0.067108306	0.26095213	0.350789794	0.627778529	0.551302654	0.672084211	0.450703682
sum i + t__number	86	86	86	86	91	91	86	91	91	91	91	91	91	91	91	91	91	91	91	68	45	43	73	90	90	87	59	89	91	89	42	42	42	39	91	20	20	19	20	18	4	4	16	20	20	20	14	20	20
sqrt(i)+sqrt(t)__CORR	0.067340634	0.030041715	0.038556171	0.044590125	-0.158347662	-0.257024554	0.106661476	-0.068478478	0.145695605	-0.172647722	-0.212359664	-0.207987008	-0.167847944	-0.190107091		0.532190873	0.582684794	-0.016169524	0.090637795	0.339232376	0.466106623	0.211237389	0.101188551	0.127057678	-0.031715597	0.02004431	-0.063194788	0.093571146	0.199141979	-0.067914207	-0.205321524	-0.090385753	-0.232070613	-0.128607151		0.677003155	0.782085965	0.030464683	-0.093661491	-0.167169043	0	0	0.534923472	-0.295478609	-0.265486738	-0.16873603	-0.174257109	0.050331612	0.119678443
sqrt(i)+sqrt(t)__p-Value	0.537859505	0.783638409	0.724497661	0.683520559	0.133838741	0.013915691	0.328343622	0.518946341	0.168203396	0.101734793	0.04329113	0.047891103	0.111758658	0.071084891		5.66E-08	1.37E-09	0.879088301	0.392862626	0.004655433	0.001250946	0.173905857	0.39431253	0.232724786	0.766657849	0.853797551	0.634431859	0.383107411	0.058433201	0.52714201	0.192087909	0.56918223	0.139173413	0.435232578		0.001043211	4.62E-05	0.901469393	0.694495549	0.507323273	1	1	0.032759464	0.205940761	0.257931493	0.476993726	0.551302654	0.833098495	0.615267647
sqrt(i)+sqrt(t)__number	86	86	86	86	91	91	86	91	91	91	91	91	91	91	91	91	91	91	91	68	45	43	73	90	90	87	59	89	91	89	42	42	42	39	91	20	20	19	20	18	4	4	16	20	20	20	14	20	20
sum g + ptc__CORR	0.133858237	0.247974672	-0.077201151	0.114128611	-0.072555676	-0.10383234	0.127634605	-0.11051378	0.091142174	-0.114914843	-0.112784318	-0.133312261	0.104121007	0.03590994		0.398719627	0.298065126	0.233831153	0.795232147	0.721871166	0.598541163	0.410529655	0.301406618	0.611216225	0.295100586	0.217010658	0.17399334	-0.02197594	0.170873176	0.188297079	0.136019192	0.162143084	-0.364221633	-0.01832199		0.110375243	-0.134775374	0.127695561	0.894148104	0.504554959	0	-0.23570226	0.421432916	0.177944394	0.249791927	-0.077533775	-0.174257109	0.112626556	-0.260899158
sum g + ptc__p-Value	0.283934469	0.044692318	0.537813802	0.361528714	0.550573056	0.392331342	0.307121357	0.362416522	0.453023646	0.343497122	0.35257753	0.271241978	0.391009412	0.767894874	1	0.000628945	0.012205826	0.051385376	2.01E-16	3.75E-12	1.77E-05	0.006249579	0.018248197	2.43E-08	0.013832064	0.075471559	0.195521359	0.85775509	0.157270479	0.118514393	0.390393281	0.304936884	0.017726464	0.911848516	1	0.662836479	0.593897789	0.613595504	5.66E-07	0.032729483	1	0.76429774	0.117695213	0.479924222	0.317475398	0.759762383	0.551302654	0.656355793	0.295706045
sum g + ptc__number	66	66	66	66	70	70	66	70	70	70	70	70	70	70	70	70	70	70	70	68	44	43	61	69	69	68	57	69	70	70	42	42	42	39	70	18	18	18	18	18	4	4	15	18	18	18	14	18	18
sum g + c4d__CORR	0.027163887	0.002427273	-0.148770202	-0.060971293	-0.123216363	-0.107067164	0.052886188	-0.238244091	-0.060280571	-0.017568462	-0.035674658	-0.048757042	-0.017558643	-0.04560686		0.220949183	0.238859432	0.206773191	0.634531828	0.534447525	0.394446903	0.369857142	0.667605028	0.526032527	0.303373666	0.160646956	0.087230388	-0.120309283	0.009914622	-0.002395489	0.175976943	0.211646877	-0.364415174	0.057570732		0.308278448	0.183953386	-0.040032038	0.732142857	0.406128085	0	-0.23570226	0.801153515	0.168986747	0.282952451	0.050518149	0.096725636	0.173464883	-0.318769217
sum g + c4d__p-Value	0.820811761	0.983855384	0.212317585	0.610907978	0.285696966	0.354024502	0.659061465	0.036930115	0.602518655	0.879460816	0.758065856	0.673686462	0.879527679	0.693686006	1	0.053477158	0.036430792	0.071183783	5.78E-10	5.40E-06	0.008859776	0.017308535	2.03E-10	1.06E-06	0.007721377	0.174554262	0.51878711	0.303879568	0.931800673	0.983726578	0.277396063	0.189845591	0.02078818	0.735023633	1	0.245375741	0.495250265	0.882976731	0.001261092	0.133072415	1	0.76429774	0.00019132	0.531550312	0.288283029	0.852602906	0.75325773	0.520565047	0.228839164
sum g + c4d__number	72	72	72	72	77	77	72	77	77	77	77	77	77	77	77	77	77	77	77	64	43	41	71	76	76	73	57	75	77	75	40	40	40	37	77	16	16	16	16	15	4	4	16	16	16	16	13	16	16
sum ptc + C4d__CORR	-0.109436147	0.010423687	-0.1243849	-0.116974493	0.033288299	-0.052041951	-0.011885749	-0.250135356	0.052975469	0.003941592	-0.019464806	-0.029823066	-0.085668288	-0.106630818		0.317153683	0.231401177	0.288098892	0.469085283	0.638636668	0.484961589	0.269600503	0.741311254	0.449747731	0.250621997	0.115658471	0.019667531	0.038173969	0.019592397	0.038927305	0.058856539	0.072809035	-0.388330264	-0.067505267		0.148076426	0.242786567	0.149403576	0.721071424	0.559016994	0	-0.577350269	0.747017881	0.412691268	0.321289782	0.187673185	0.149278098	0.280694729	-0.105758739
sum ptc + C4d__p-Value	0.401151205	0.936452395	0.339529545	0.369299105	0.792362235	0.680549292	0.927561423	0.044474021	0.675136299	0.975140631	0.877688693	0.81356588	0.497437361	0.397877231	1	0.010047521	0.063642379	0.019952562	8.10E-05	1.36E-08	0.001134078	0.08826451	1.89E-11	0.000192706	0.045774963	0.366705378	0.886667829	0.76457238	0.876893164	0.758181919	0.718285848	0.655253293	0.013279828	0.69138337	1	0.598427774	0.383270923	0.595116082	0.00241662	0.030281873	1	0.422649731	0.001372665	0.126319821	0.242934106	0.50299276	0.626442539	0.310880387	0.707569759
sum ptc + C4d__number	61	61	61	61	65	65	61	65	65	65	65	65	65	65	65	65	65	65	65	64	42	41	59	64	64	63	55	64	65	65	40	40	40	37	65	15	15	15	15	15	4	4	15	15	15	15	13	15	15
sum_g_ptc_c4d__CORR	-0.003717533	0.08678288	-0.175939767	-0.062201804	-0.070024276	-0.080207676	0.044301175	-0.212088374	0.019649202	0.015823953	0.002716665	-0.011573483	0.017853397	-0.021259214		0.314745905	0.254354603	0.263577849	0.703443783	0.660520739	0.50228584	0.361069225	0.620396712	0.606136877	0.329036757	0.196566392	0.105615183	-0.012430718	0.088825669	0.096271231	0.135580301	0.173484574	-0.387202268	0.003761961		0.107955583	0.099363783	0.091979546	0.908399887	0.516233922	0	-0.23570226	0.666851709	0.324173245	0.479628809	0.174435441	0.045543461	0.34942849	-0.190786932
sum_g_ptc_c4d__p-Value	0.977315783	0.506031179	0.17499974	0.633915648	0.579386746	0.525342147	0.734600926	0.089869227	0.876539027	0.90043712	0.982864745	0.927094554	0.8877459	0.866512044	1	0.010662026	0.040890017	0.033882158	6.38E-11	2.87E-09	0.000700196	0.020377331	1.60E-07	1.11E-07	0.007936051	0.122573506	0.442830336	0.922337687	0.481661491	0.445536241	0.404193108	0.284365529	0.01357325	0.982369974	1	0.701749596	0.724596821	0.744407521	2.81E-06	0.048831874	1	0.76429774	0.006620868	0.238490234	0.070419701	0.53409161	0.882549415	0.201732388	0.49580242
sum_g_ptc_c4d__number	61	61	61	61	65	65	61	65	65	65	65	65	65	65	65	65	65	65	65	64	42	41	59	64	64	63	55	64	65	65	40	40	40	37	65	15	15	15	15	15	4	4	15	15	15	15	13	15	15
acr score: 0=none, 2=borderline, 3=acr__CORR	0.019589344	0.01554562	0.03066723	0.006946005	-0.147643408	-0.256784928	0.087537817	-0.104822454	0.121890827	-0.176327925	-0.210856389	-0.213143248	-0.185564662	-0.230025765		0.512174512	0.534754721	-0.004089457	0.132855209	0.352747214	0.431626499	0.212080919	0.090793283	0.135268963	-0.017349097	0.016340452	-0.047697489	0.097809821	0.172392735	-0.018608593	-0.187041606	-0.065300326	-0.240690103	-0.154243332		0.654380676	0.802481145	-0.046635913	-0.096233161	-0.169547457	0	0	0.501849725	-0.266507922	-0.216339764	-0.21810942	-0.222511541	-0.025856785	0.128146872
acr score: 0=none, 2=borderline, 3=acr__p-Value	0.857919671	0.887030127	0.779246935	0.949390037	0.162526238	0.014007957	0.422869155	0.322738081	0.249737113	0.094536894	0.044829296	0.042506899	0.078232894	0.028273133		2.11E-07	4.76E-08	0.969311514	0.209329384	0.003173932	0.00307167	0.172153479	0.444909647	0.203661962	0.871070014	0.880591733	0.719792043	0.361831537	0.102248972	0.862583539	0.235587157	0.681173668	0.124673905	0.348482624		0.001745816	2.07E-05	0.849635881	0.686510131	0.50121257	1	1	0.047621961	0.256036119	0.35960426	0.355590983	0.444508546	0.913831571	0.590288728
acr score: 0=none, 2=borderline, 3=acr__number	86	86	86	86	91	91	86	91	91	91	91	91	91	91	91	91	91	91	91	68	45	43	73	90	90	87	59	89	91	89	42	42	42	39	91	20	20	19	20	18	4	4	16	20	20	20	14	20	20
amr score: 0=none, 1=borderline, 2=amr__CORR	-0.006556144	0.097350653	-0.160618352	-0.051743777	-0.074341939	-0.086358681	0.027902993	-0.189996228	0.015644192	0.03876865	0.025150259	0.010701083	0.019317664	-0.018941861		0.270014677	0.220980105	0.236415262	0.668186848	0.608038045	0.459682055	0.339453449	0.592204778	0.583375049	0.312836337	0.197623705	0.125796167	-0.040443365	0.083556344	0.08408884	0.140244022	0.160459111	-0.379975658	-0.034536932		0.159144758	0.138284364	0.046225016	0.902029312	0.44474959	0	-0.23570226	0.716487753	0.281452956	0.446206287	0.154967064	0.04587349	0.3154557	-0.19176283
amr score: 0=none, 1=borderline, 2=amr__p-Value	0.960005794	0.455438659	0.216248924	0.69207796	0.556163437	0.493965031	0.830966333	0.129539065	0.901562509	0.759137647	0.842368404	0.932576799	0.878606269	0.88095049	1	0.029610059	0.076898916	0.05795593	1.19E-09	9.88E-08	0.00219418	0.029910596	7.79E-07	4.22E-07	0.011839739	0.120534507	0.360116262	0.751016035	0.50813762	0.505428642	0.388064858	0.32262389	0.015586504	0.839189848	1	0.571037729	0.623085289	0.870059225	4.29E-06	0.096695821	1	0.76429774	0.002653935	0.309519605	0.095478081	0.581314202	0.881703659	0.252080696	0.493558829
amr score: 0=none, 1=borderline, 2=amr__number	61	61	61	61	65	65	61	65	65	65	65	65	65	65	65	65	65	65	65	64	42	41	59	64	64	63	55	64	65	65	40	40	40	37	65	15	15	15	15	15	4	4	15	15	15	15	13	15	15
[truncated: 54 more columns]
